1 **Coupling of H3K27me3 recognition with transcriptional repression**  
2 **through the BAH-PHD-CPL2 complex in *Arabidopsis***

3

4 Yi-Zhe Zhang<sup>1,2†</sup>, Jianlong Yuan<sup>1,2†</sup>, Lingrui Zhang<sup>3†</sup>, Chunxiang Chen<sup>1</sup>, Yuhua Wang<sup>1</sup>,  
5 Guiping Zhang<sup>1</sup>, Li Peng<sup>1</sup>, Si-Si Xie<sup>1,2</sup>, Jing Jiang<sup>4</sup>, Jian-Kang Zhu<sup>1,3\*</sup>, Jiamu Du<sup>5\*</sup> and  
6 Cheng-Guo Duan<sup>1,4\*</sup>

7

8 <sup>1</sup>Shanghai Center for Plant Stress Biology and CAS Center for Excellence in Molecular  
9 Plant Sciences, Chinese Academy of Sciences, Shanghai 201602, China.

10 <sup>2</sup>University of Chinese Academy of Sciences, Beijing 100049, China.

11 <sup>3</sup>Department of Horticulture and Landscape Architecture, Purdue University, West  
12 Lafayette, IN 47907, USA

13 <sup>4</sup>State Key Laboratory of Crop Stress Adaptation and Improvement, School of Life  
14 Sciences, Henan University, Kaifeng 475004, China

15 <sup>5</sup>Key Laboratory of Molecular Design for Plant Cell Factory of Guangdong Higher Ed-  
16 ucation Institutes, Institute of Plant and Food Science, School of Life Sciences, South-  
17 ern University of Science and Technology, Shenzhen 518055, China.

18

19 †These authors contributed equally to this work.

20

21 \*CORRESPONDING AUTHORS:

22

23 Cheng-Guo Duan ([cgduan@psc.ac.cn](mailto:cgduan@psc.ac.cn))

24 Jiamu Du ([dujm@sustech.edu.cn](mailto:dujm@sustech.edu.cn))

25 Jian-Kang Zhu ([jkzhu@psc.ac.cn](mailto:jkzhu@psc.ac.cn))

26

27

28 **SUMMARY**

29 Histone 3 Lys 27 trimethylation (H3K27me<sub>3</sub>)-mediated epigenetic silencing plays a  
30 critical role in multiple biological processes. However, the H3K27me<sub>3</sub> recognition and  
31 transcriptional repression mechanisms are only partially understood. Here, we report a  
32 new mechanism for H3K27me<sub>3</sub> recognition and transcriptional repression. Our  
33 structural and biochemical data showed that the BAH domain protein AIPP3 and the  
34 PHD proteins AIPP2 and PAIPP2 cooperate to read H3K27me<sub>3</sub> and unmodified H3K4  
35 histone marks, respectively, in *Arabidopsis*. The BAH-PHD bivalent histone reader  
36 complex silences a substantial subset of H3K27me<sub>3</sub>-enriched loci, including a number  
37 of development and stress response-related genes such as the RNA silencing effector  
38 gene *ARGONAUTE 5 (AGO5)* and We found that the BAH-PHD module associates  
39 with CPL2, a plant-specific Pol II carboxyl terminal domain (CTD) phosphatase, to  
40 form the BAH-PHD-CPL2 complex (BPC) for transcriptional repression. The BPC  
41 complex represses transcription through CPL2-mediated CTD dephosphorylation,  
42 thereby causing inhibition of Pol II release from the transcriptional start site. Our work  
43 reveals a mechanism coupling H3K27me<sub>3</sub> recognition with transcriptional repression  
44 through the alteration of Pol II phosphorylation states, thereby contributing to our  
45 understanding of the mechanism of H3K27me<sub>3</sub>-dependent silencing.

46

47 **KEYWORDS**

48 H3K27me<sub>3</sub>; CPL2; BAH; PHD; Pol II; H3K4; Flowering;

49

50

51

52

53

54

55

56

57

58

59

60

61

## 62 INTRODUCTION

63 In eukaryotic cells, the N-terminal histone tails undergo numerous posttranslational  
64 modifications (PTMs). Histone modification acts as a mark to specify the chromatin  
65 status as well as potential functional indications<sup>1</sup>. The deposition, recognition and  
66 removal of specific histone PTMs are dynamically regulated by different proteins or  
67 protein complexes called ‘writer’, ‘reader’, and ‘eraser’ modules, respectively<sup>2,3,4</sup>. The  
68 reader module can specifically recognize certain histone mark in both sequence- and  
69 modification-specific manners, and subsequently transmits the signal to downstream  
70 effectors. As a repressive epigenetic mark localized in euchromatin, deposition of  
71 trimethylation on histone H3 lysine 27 (H3K27me3) has been observed in many  
72 important functional genes<sup>5</sup>. The polycomb repressive complexes (PRCs), consisting  
73 of a different polycomb group (PcG) of proteins, have been shown to be involved in the  
74 deposition and downstream action of H3K27me3 mark<sup>6</sup>. Different PcG proteins  
75 associate to form two functionally distinct complexes, PRC1 and PRC2. The PRC1  
76 complex has E3 ligase activity which has been shown to catalyze the  
77 monoubiquitination of histone H2A at lysine (H2Aub1), and the PRC2 complex  
78 catalyzes H3K27me2 and H3K27me3<sup>7,8,9,10</sup>. Three major models have been proposed  
79 to explain the mechanisms of PRC complex-mediated transcription repression<sup>8</sup>. For  
80 those bivalent promoters marked by both H3K27me3 and H3K4me3 marks, PcG  
81 complexes are believed to hold the poised Pol II at the transcription start site (TSS),  
82 resulting in the inhibition of Pol II release. Alternatively, PcG complexes can alter the  
83 chromatin environment by inducing chromatin condensation, thereby blocking the  
84 accessibility of chromatin remodeling complexes that is required for transcription  
85 activation<sup>11,12,13</sup>. Third, the histone PTMs might directly prevent Pol II processivity  
86 during transcription elongation<sup>8</sup>. For example, studies in *Drosophila* have indicated that  
87 H3K27me3 could limit Pol II recruitment to gene promoters<sup>14</sup>. H2Aub1 has been  
88 implicated in restraining Pol II elongation<sup>15,16</sup>. However, the detailed mechanisms  
89 through which H3K27me3 reading is connected to transcriptional repression are not  
90 fully understood.

91

92 Histone mark recognition in plants is generally similar to that in animals but sometimes  
93 possesses plant-specific mark-reader pairs<sup>17</sup>. The PHD and BAH domains are two types  
94 of histone binding domains in eukaryotes<sup>18,19</sup>. The PHD finger has been reported to  
95 recognize methylated/unmethylated H3K4 marks and lysine acetylation marks<sup>19</sup>, and

96 the BAH domain can bind distinct histone marks, including H3K9me<sup>20</sup>, H4K20me<sup>21</sup>,  
97 unmodified H3K4<sup>22</sup>, nucleosome core particle<sup>23, 24, 25, 26</sup> and the more recently identified  
98 H3K27me<sup>3</sup><sup>27, 28, 29, 30</sup>. In plants and animals, a large number of development and  
99 environmental response-related processes are subjected to H3K27me<sub>3</sub>-dependent  
100 regulation. Among them, flowering control has been a paradigmatic model for PRC  
101 complexes-mediated transcriptional repression in plants. The H3K27me<sub>3</sub> dynamics in  
102 the flowering repressor gene *FLOWERING LOCUS C (FLC)* and the florigen gene  
103 *FLOWERING LOCUS T (FT)* play essential roles in the flowering time control<sup>31</sup>, and  
104 the H3K27me<sub>3</sub> regulators influence flowering time in different ways<sup>27, 28, 29, 32, 33, 34, 35,</sup>  
105 <sup>36, 37, 38, 39, 40</sup>. Here, we demonstrated that the BAH domain-containing protein ASI1-  
106 IMMUNOPRECIPITATED PROTEIN 3 (AIPP3) and two PHD domain-containing  
107 proteins AIPP2/PARALOG OF AIPP2 (PAIPP2) could form a BAH-PHD module to  
108 read H3K27me<sub>3</sub> and unmethylated H3K4, respectively, and coordinate in  
109 implementing transcriptional repression of hundreds of genes, particularly those  
110 development and stress-responsive genes in *Arabidopsis* such as the florigen gene *FT*  
111 and the RNA silencing effector gene *AGO5*. Moreover, our structural and biochemical  
112 studies further revealed the molecular basis for the specific recognition of these histone  
113 marks. We also revealed that the BAH-PHD module represses the release of Pol II from  
114 TSS regions by cooperating with CPL2, a known plant-specific Pol II CTD Ser5  
115 phosphatase. Collectively, our findings reveal a coupling of the H3K27me<sub>3</sub> recognition  
116 and downstream transcriptional repression through the BPC complex. This pathway  
117 may represent a mechanism of H3K27me<sub>3</sub>-mediated gene silencing.

118

119

120

121

122

123

124

125

126

127

128

129

130 **RESULTS**

131 **BAH protein AIPP3 associates with PHD proteins and CPL2 to form a protein**  
132 **complex in *Arabidopsis***

133 Through a mass spectrometry analysis of the chromatin regulator Anti-silencing 1  
134 (ASI1), we previously demonstrated that BAH domain-containing protein AIPP3 and  
135 PHD protein AIPP2 and CPL2 are associated with ASI1<sup>41,42</sup>. AIPP2 is known to interact  
136 with AIPP3 and CPL2<sup>41</sup>. This association was further confirmed by  
137 immunoprecipitation assays coupled to a mass spectrometry analysis (IP-MS) of  
138 AIPP3, AIPP2 and CPL2 in which AIPP3, AIPP2 and CPL2 could be mutually co-  
139 purified with one another except for ASI1 (Fig. 1a and Supplementary Table 1).  
140 Interestingly, another PHD protein encoded by *AT5G16680* (Supplementary Fig. 1), the  
141 closest paralog of AIPP2 (hereafter referred to as PAIPP2) in *Arabidopsis*, was co-  
142 purified with AIPP3 and CPL2, and AIPP3 and CPL2 were also present in the IP-MS  
143 of PAIPP2 (Fig. 1a). The yeast two-hybrid (Y2H) and split luciferase assays indicated  
144 that PAIPP2 could also interact with AIPP3 and CPL2 but not with AIPP2 (Fig. 1b and  
145 Supplementary Fig. 2). Regarding the domain requirements for protein interactions, the  
146 Y2H results indicated that the BAH domain-containing N terminus of AIPP3 and the  
147 RBM motif-containing C terminus region of CPL2 are required for their interactions  
148 with AIPP2 and PAIPP2, respectively (Supplementary Fig. 3). AIPP2 and PAIPP2 were  
149 divided into three parts: the N terminus (N), PHD that is followed by a frequently  
150 associated polybasic region (PHD-PBR) and the C terminus (C) (Supplementary Fig.  
151 4). The PHD-PBR part is indispensable for AIPP2/PAIPP2-AIPP3 interactions.  
152 Intriguingly, the PHD-PBR interaction with AIPP3 could be strengthened and inhibited  
153 by the N and C termini of AIPP2/PAIPP2, respectively (Supplementary Fig. 4),  
154 indicating the presence of an intramolecular regulation mode within AIPP2 and  
155 PAIPP2. The C termini of AIPP2 and PAIPP2 were fully responsible for the interaction  
156 with CPL2. Thus, we reasoned that the PHD proteins AIPP2 and PAIPP2 interact with  
157 AIPP3 and CPL2 independently to associate *in vivo* (Fig. 1c). Moreover, the gel  
158 filtration assay that was performed using epitope-tagged transgenic lines indicated that  
159 these four proteins co-eluted in the same fractions (Fig. 1d). Thus, these data support  
160 the notion that the BAH protein AIPP3 associates with two PHD proteins and CPL2 to  
161 form a protein complex *in vivo* (which are hereafter referred to as the BAH-PHD-CPL2  
162 complex or the BPC complex).

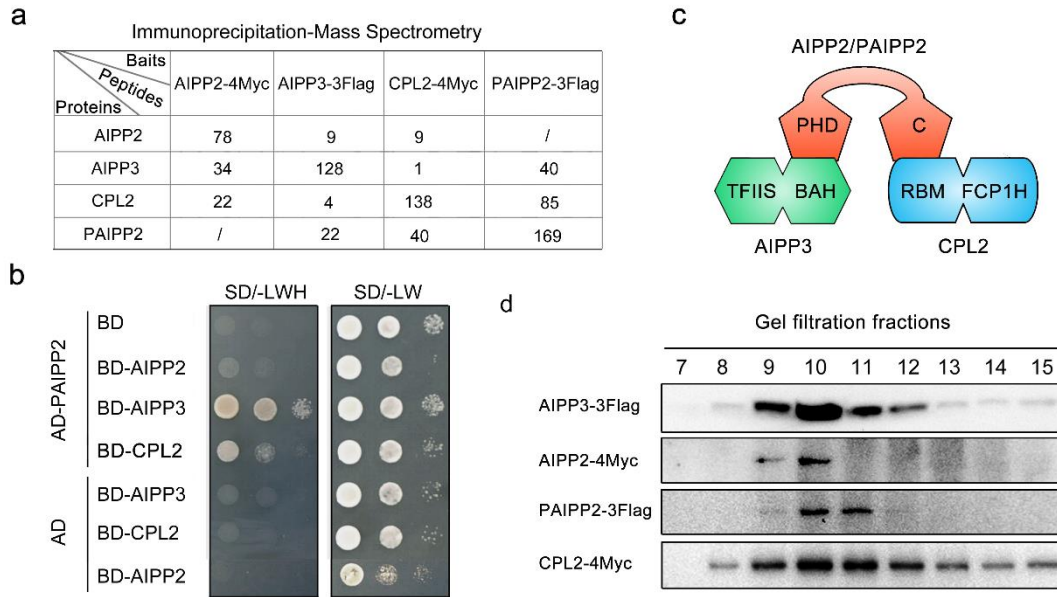

163

164 **Fig. 1 The BAH protein AIPP3 associates with PHD proteins and CPL2 to form a**  
 165 **protein complex.** **a** Mass spectrometry analysis of epitope-tagged *AIPP3*, *AIPP2*,  
 166 *PAIPP2* and *CPL2* transgenic plants. **b** Y2H results showing the reciprocal interactions  
 167 within the tested proteins. **c** A diagram showing the interaction network within AIPP3,  
 168 AIPP2, PAIPP2 and CPL2. **d** Immunoblotting results of gel filtration assays.

169

### 170 The BAH-PHD-CPL2 complex represses flowering by inhibiting *FT* expression

171 By generating native promoter-driven  $\beta$ -glucuronidase (*GUS*) reporter transgenes, we  
 172 observed that the BAH-PHD-CPL2 complex genes were ubiquitously expressed in *Ar-*  
 173 *abidopsis* (Supplementary Fig. 5). To explore the biological function of the BAH-PHD-  
 174 CPL2 complex, the null mutants of *PAIPP2* were generated using CRISPR/Cas9-me-  
 175 diated gene editing (Supplementary Fig. 6), and the morphology and flowering pheno-  
 176 types of the generated *paipp2-1* mutant as well as the reported *aipp3-1*, *aipp2-1* and  
 177 *cpl2-2* mutants were investigated<sup>41</sup>. The *aipp3-1*, *cpl2-2* and *aipp2-1/paipp2-1* dis-  
 178 played multiple developmental defects, such as a dwarfed size, small leaves and poor  
 179 fertility (Fig. 2a). Instead, the *aipp2-1* and *paipp2-1* mutants only showed mild devel-  
 180 opmental defects. Moreover, the *aipp3-1* and *cpl2-2* mutants showed obvious earlier  
 181 flowering during both long day (LD) and short day (SD) photoperiods in comparison  
 182 with Col-0 (Fig. 2b, c). Although only mild early flowering was observed in the *aipp2-1*  
 183 and *paipp2-1* single mutants, *aipp2-1/paipp2-1* showed similar early flowering com-  
 184 pared with the *aipp3-1* and *cpl2-2* mutants (Fig. 2b, c), suggesting a redundancy in  
 185 these two PHD proteins in relation to the flowering time control. To dissect their genetic  
 186 relationship, we attempted to generate double, triple and quadruple mutants. Unfortu-



187 nately, we failed to obtain the *aipp3/aipp2/paipp2/cpl2* quadruple mutant due to a se-  
 188 vere developmental defect. Compared to Col-0, the *aipp3-1/aipp2-1/paipp2-1*, *aipp3-*  
 189 *1/cpl2-2* and *aipp2-1/paipp2-1/cpl2-2* mutants flowered earlier, and the time to flower  
 190 was similar to the single mutants under the LD condition (Fig. 2d), suggesting that the  
 191 BAH-PHD-CPL2 complex acts in the same genetic pathway in flowering time control.

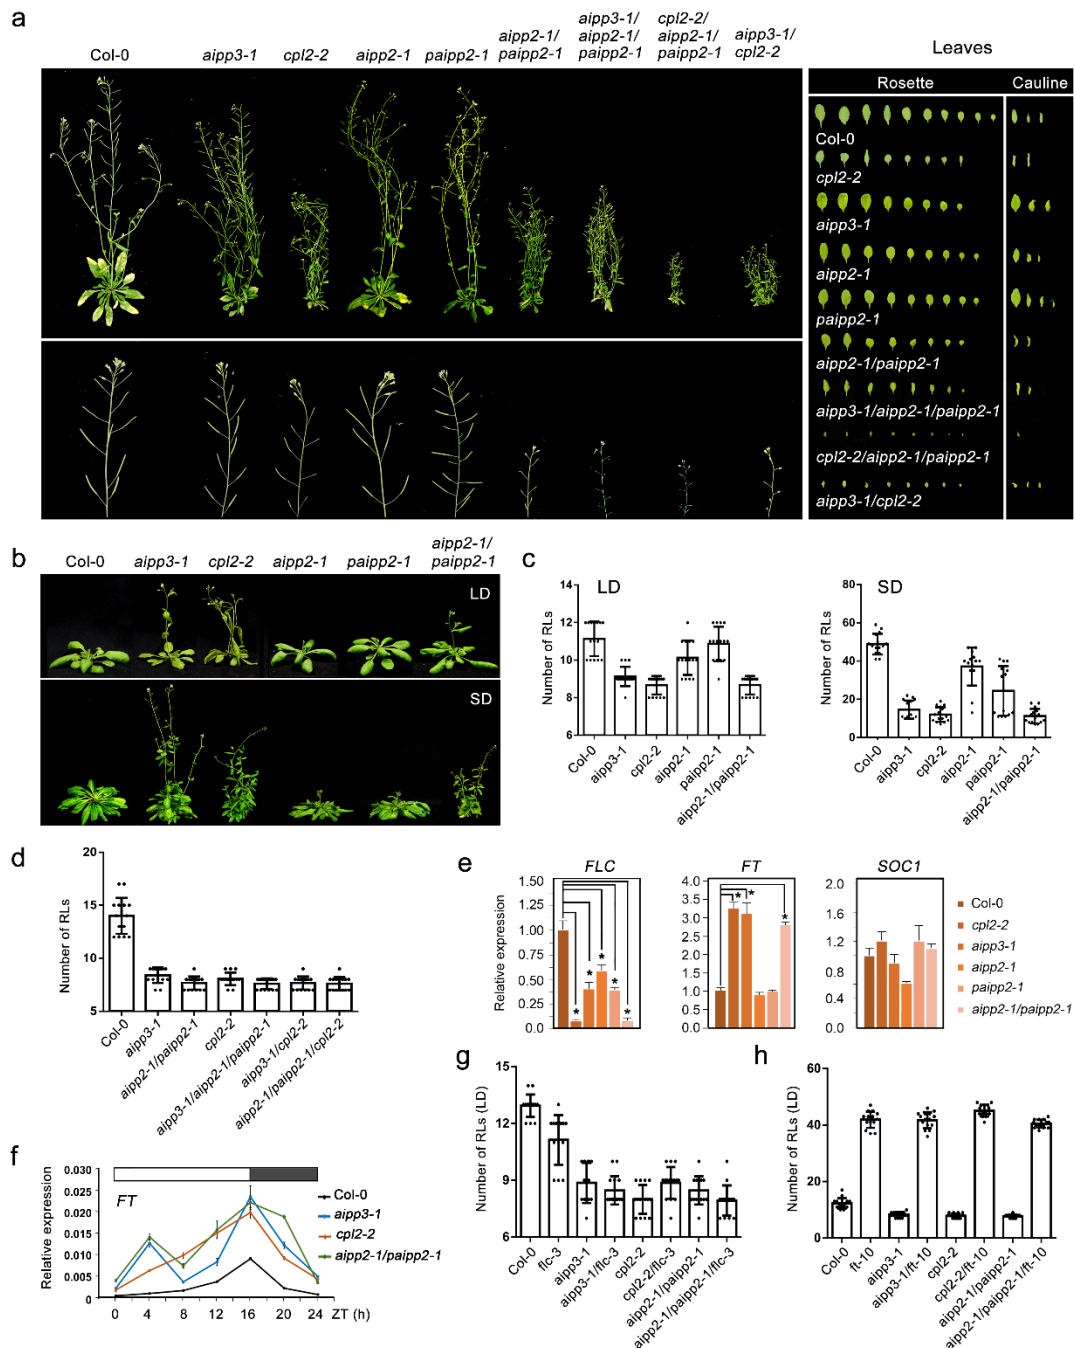

192

193 **Fig. 2 The BAH-PHD-CPL2 complex regulates plant development and flowering**  
 194 **time.** **a** The phenotypic developmental defects of *bpc* mutants. The morphological  
 195 phenotypes of whole plants, inflorescence tissues, rosette and cauline leaves were  
 196 shown. **b-c** The flowering phenotypes (**b**) and the numbers of rosette leaf (RLs) at  
 197 flowering (**c**) in selected mutants during LD and SD photoperiods. **d** Comparison of the

198 number of RLs at flowering in selected mutants under the LD condition. **e** The relative  
199 mRNA levels of the *FLC*, *FT* and *SOC1* genes in the selected mutants. The mRNA  
200 levels were first normalized to *ACT2* and then to Col-0. The data are the means  $\pm$ S.D.  
201 of three biological repeats. Significance analysis (t-test) was performed and \* represent  
202 p vale  $<0.01$ . **f** The circadian accumulation of *FT* mRNA in selected mutants. The *FT*  
203 mRNA levels were normalized to *ACT2*. The data are the means  $\pm$ S.D. of three  
204 biological repeats. The white and black boxes represent light and dark periods,  
205 respectively. **g-h** The numbers of RLs in the BAH-PHD-CPL2 complex mutants and  
206 their double mutants with *flc-3* (g) and *ft-10* (h) at flowering during the LD photoperiod.  
207

208 In *Arabidopsis*, FLC, which is a MADS-box transcription factor that integrates multiple  
209 flowering signals, acts as a key floral repressor<sup>31, 43, 44</sup>. FLC directly represses the  
210 expression of florigen gene *FT* and *SUPPRESSOR OF OVEREXPRESSION OF CO*  
211 *1(SOC1)* by binding to the promoter of *SOC1* and the first intron of *FT*<sup>45</sup>. The  
212 quantitative RT-PCR (RT-qPCR) indicated that the *FLC* RNA levels were reduced in  
213 the *aipp3-1*, *aipp2-1*, *cpl2-2*, *paipp2-1* and *aipp2-1/paipp2-1* mutants compared to Col-  
214 0 (Fig. 2e). Instead, the *FT* RNA levels were significantly increased in the *aipp3-1*,  
215 *cpl2-2* and *aipp2-1/paipp2-1* mutants but not in the *aipp2-1* and *paipp2-1* single  
216 mutants, further supporting the functional redundancy of AIPP2 and PAIPP2. By  
217 contrast, the *SOC1* RNA level was not significantly changed in all the tested mutants.  
218 It is known that the accumulation of FT protein has a circadian rhythm that peaks before  
219 dusk during LD photoperiod<sup>46, 47, 48</sup>. We noticed that the loss of the BAH-PHD-CPL2  
220 complex did not change the circadian rhythm of *FT* mRNA but led to a constitutive  
221 increase (Fig. 2f). To determine the genetic relationship between FLC, FT and the BAH-  
222 PHD-CPL2 complex in relation to the flowering time control, *flc-3* and *ft-10* mutants  
223 (in Col-0 background) were crossed with the tested mutants. Surprisingly, the *aipp3-1*  
224 */flc-3*, *cpl2-2/flc-3*, *aipp2-1/paipp2-1/flc-3* mutants displayed similar early flowering  
225 compared with the with *aipp3-1*, *cpl2-2* and *aipp2-1/paipp2-1* mutants, but they  
226 flowered earlier than the *flc-3* single mutant (Fig. 2g). By contrast, the early flowering  
227 phenotypes of *aipp3-1*, *cpl2-2* and *aipp2-1/paipp2-1* mutants were completely rescued  
228 by *ft-10* (Fig. 2h), indicating that the BAH-PHD-CPL2 complex represses flowering  
229 primarily by repressing the expression of *FT*.

### 230 **The AIPP3-BAH domain specifically recognizes the H3K27me3 mark**

231 The chromatin-based mechanisms play vital roles in the flowering time control<sup>1, 49, 50</sup>.  
232 The BAH domain is commonly identified as an epigenetic reader module of a particular  
233 histone mark<sup>18</sup>. To decipher the molecular function of the AIPP3-BAH domain (Fig.  
234 3a), we firstly performed a histone peptide pull-down assay using purified AIPP3-BAH



235 protein. Among all the tested histone peptides, AIPP3-BAH could only be pulled down  
236 by H3K27me1, H3K27me2 and H3K27me3 peptides in a sequentially increasing  
237 manner (Fig. 3b). The H3K27me3-binding activity was further confirmed by isothermal  
238 titration calorimetry (ITC) binding analysis (Fig. 3c). Among all four tested histone  
239 methylation marks, H3K4me3, H3K9me2, H3K27me3 and H3K36me3, the AIPP3-  
240 BAH domain showed a significant preference for the H3K27me3 mark. Moreover,  
241 consistent with the histone pull-down result, AIPP3-BAH has a preference for the  
242 higher methylation level in H3K27. Thus, the evidence above fully demonstrated that  
243 AIPP3-BAH is a H3K27me3 reader module.

244

### 245 **Structure of the AIPP3-BAH domain in complex with an H3K27me3 peptide**

246 To gain molecular insight into the interaction between the AIPP3-BAH domain and  
247 H3K27me3, we successfully determined the crystal structure of the AIPP3-BAH  
248 domain in complex with an H3K27me3 peptide at a resolution of 2.4 Å (Fig. 3d and  
249 Supplementary Table 2). Overall, the AIPP3-BAH domain has a classic  $\beta$ -barrel  
250 structure that is similar to other reported BAH domain structures<sup>18</sup>. The H3K27me3  
251 peptide has a good electron density map and a  $\beta$ -strand-like extended conformation  
252 (Supplementary Fig. 7a). The peptide is captured by a negatively charged cavity that is  
253 formed on the surface of the AIPP3-BAH domain with extensive hydrophobic and  
254 hydrophilic interactions (Fig. 3e). In detail, the three aromatic residues of the AIPP3-  
255 BAH domain, Tyr149, Trp170 and Try172, form an aromatic cage to accommodate the  
256 trimethyl-lysine of the H3K27me3 peptide (Fig. 3f), and it resembles other typical  
257 methyl-lysine-reading histone readers<sup>51</sup>. At the N-terminus, the H3A25 forms two main  
258 chain-main chain hydrogen bonds with the AIPP3 Val140 and Glu142 (Fig. 3f). In the  
259 middle, the AIPP3 residues Trp170, Tyr172, His198, and Asp200 form an extensive  
260 hydrogen-binding network with H3S28, which further fixes the imidazole ring of  
261 His198 in a special rotamer state that is parallel with the prolyl ring of H3P30. This  
262 parallel alignment of the two rings enables the CH- $\pi$  and stacking interactions between

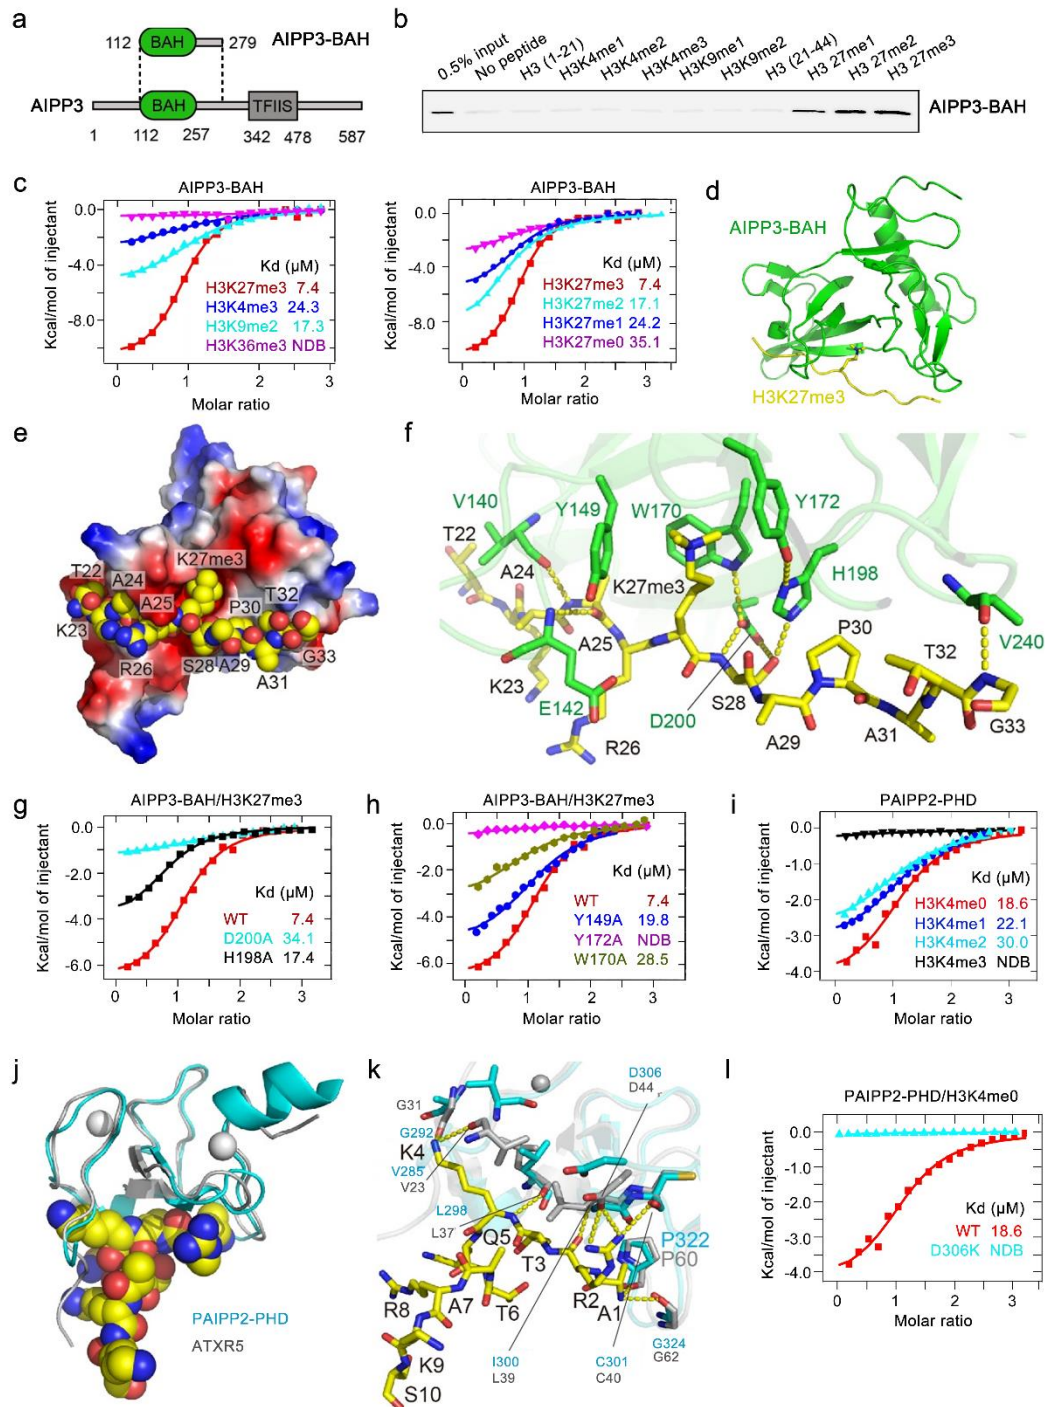

263

264 **Fig. 3 Structural analysis of the AIPP3-BAH domain and PAIPP2-PHD finger in**  
 265 **complex with H3K27me3 and unmodified H3K4 peptide, respectively.** **a**  
 266 The domain architecture of AIPP3 (lower panel) and the BAH domain construct used for  
 267 structural and biochemical studies (upper panel). **b** The immunoblotting results  
 268 showing the pull-down results for AIPP3-BAH and mutated proteins using different  
 269 histone peptides. The 0.5% inputs serve as positive controls. **c** The ITC binding curves  
 270 showing the AIPP3-BAH domain-binding preference for different histone methylation  
 271 marks (left panel) and different H3K27 methylation levels (right panel). **d** The overall  
 272 structure of the AIPP3-BAH domain-H3K27me3 peptide complex shown in ribbon  
 273 with the AIPP3-BAH domain and the H3K27me3 peptide colored in green and yellow,  
 274 respectively. **e** An electrostatic surface view of AIPP3-BAH domain with the

275 H3K27me3 peptide in the space-filling model showing the peptide fit inside a  
276 negatively charged surface cleft of the AIPP3-BAH domain. **f** The detailed interaction  
277 between AIPP3-BAH domain and the H3K27me3 peptide with the interacting residues  
278 highlighted in sticks and the hydrogen bonds highlighted in dashed yellow lines. **g-h**  
279 The ITC binding curves show that the mutations of essential residues for the H3P30  
280 recognition (**g**) and aromatic cage residues (**h**) of the AIPP3 BAH domain significantly  
281 decrease the binding towards the H3K27me3 peptide. **i** The ITC binding curves  
282 showing the specific preference of the PAIPP2-PHD finger for the unmodified H3K4.  
283 **j** The overall modeled structure of the PAIPP2-PHD finger in complex with the  
284 unmodified H3 peptide with the PHD finger and peptide shown in ribbon and space-  
285 filling models. The modeled PAIPP2-PHD finger and the modeling template ATXR5  
286 PHD finger are colored in cyan and silver, respectively, and they were superimposed  
287 together. **k** The detailed interaction between the PAIPP2-PHD finger (in cyan) and the  
288 unmodified H3K4 peptide with the interacting residues are highlighted in stick model  
289 and hydrogen bonds highlighted in dashed yellow lines. The corresponding residues  
290 from modeling template ATXR5 (in silver) were overlain and highlighted, showing that  
291 almost all the interacting residues are conserved. **l** The ITC binding curves showing  
292 that the D306K mutation of PAIPP2-PHD finger, which potentially disrupts H3R2  
293 recognition, totally abolishes the unmodified H3K4 binding by PAIPP2.  
294

295 AIPP3 His198 and H3P30, which resemble the recognition of H3K27me3 by the EBS  
296 and SHL BAH domains with conserved key residues (Supplementary Fig. 7b)<sup>27, 28</sup>. In  
297 the C-terminus, H3G33 interacts with AIPP3 Val240 through a main chain-main chain  
298 hydrogen bond. To validate these structural observations, we performed a mutagenesis  
299 analysis on the key residues. The mutations D200A and H198A, which are essential for  
300 H3P30 recognition, in addition to Y149A, W170A, and Y172A, which represent  
301 important aromatic cage residues, showed reduced or no detectable binding to the  
302 H3K27me3 peptide (Fig. 3g, h).

303

#### 304 **PHD fingers of AIPP2 and PAIPP2 recognize the unmodified H3K4 mark**

305 In addition to AIPP3-BAH, the PHD fingers of AIPP2 and PAIPP2 may also be  
306 involved in the recognition of histone marks. AIPP2 and PAIPP2 share a conserved  
307 PHD finger in their sequences (Supplementary Fig. 8a), and their sequences of PHD  
308 fingers are the typical signatures of unmodified H3 recognition PHD fingers<sup>19</sup>. We first  
309 detected their histone substrate binding properties by ITC method. Although the  
310 AIPP2-PHD finger does not behave well *in vitro* and tends to precipitate, we  
311 successfully detected the binding between the PAIPP2-PHD finger and the  
312 differentially methylated H3K4 peptides (Fig. 3i). The PAIPP2-PHD finger prefers to  
313 bind to unmethylated H3K4 and the binding affinities were clearly decreased when the  
314 methylation level of the H3K4 peptide was increased. Considering the high sequence

315 similarity between the two PHD fingers (Supplementary Fig. 8a), we believe that the  
316 AIPP2-PHD finger may possess the same binding preference on the unmodified H3K4.  
317 Moreover, both AIPP2 and PAIPP2 PHD fingers share approximately 35% sequence  
318 identity with the PHD finger of *Glycine max* ATXR5 (PDB ID: 5VAB) (Supplementary  
319 Fig. 8a), which recognizes the unmodified H3K4<sup>52</sup>. We modelled the AIPP2 and  
320 PAIPP2 PHD fingers using the ATXR5 PHD finger as a template to analyze the  
321 interactions with unmodified H3K4 (Fig. 3j and Supplementary Fig. 8b). In the  
322 modelled structure, we noticed that almost all the peptide-binding residues are  
323 conserved (Supplementary Fig. 8a). For instance, the Pro322 and Gly324 of PAIPP2,  
324 which correspond to the ATXR5 Pro60 and Gly62, respectively, are involved in the  
325 hydrogen-binding interaction with H3A1 (Fig. 3k). Similarly, the Ile300, Cys301,  
326 Ser302, and Asp306 of PAIPP2, which are equivalent to ATXR5 Leu39, Cys40, Asp41  
327 and Asp44, respectively, contribute to the recognition of H3R2 (Fig. 3k). The Val23,  
328 Gly31, and Leu37 of PAIPP2, which correspond to the Val285, Gly292, and Leu298 of  
329 ATXR5, participate in the recognition of the unmodified H3K4 (Fig. 3k). To validate  
330 the modelling results, we performed mutagenesis experiment, too. As most of the  
331 peptide recognition is achieved by the hydrogen bonding interactions of the main chain  
332 of the PHD finger, we only mutated Asp306 of PAIPP2, which is involved in the  
333 recognition of H3R2 by its side chain. As shown in Fig. 3l, the D306K mutation of  
334 PAIPP2 PHD finger almost totally disrupts the peptide binding, further supporting our  
335 modelling data. The AIPP2 PHD finger possesses similar unmodified H3K4  
336 recognition residues and interactions (Supplementary Fig. 8c).

337

### 338 **The BAH-PHD-CPL2 complex represses the expression of the genes marked by** 339 **H3K27me3 and low-methylated H3K4**

340 H3K27me3 is usually considered a repressive mark that functions in transcriptional  
341 repression by recruiting recognition proteins or protein complexes<sup>4, 8</sup>. To dissect the  
342 molecular function of the BAH-PHD-CPL2 complex, mRNA-Seq was performed using  
343 their null mutants as well as CLF and LHP1 mutants<sup>53, 54</sup>, which are one of the known  
344 H3K27me3 methyltransferases and a reader protein in *Arabidopsis*, respectively. Using  
345 a two-fold change cutoff, we noticed that the numbers of up-regulated differentially  
346 expressed genes (up-DEGs) were far greater than the numbers of down-DEGs in the  
347 *aipp3-1*, *cpl2-2* and *aipp2-1/paipp2-1* mutants (Fig. 4a). Supporting the functional  
348 redundancy of AIPP2 and PAIPP2, very few DEGs were identified in *aipp2-1* and



349 *paipp2-1* single mutants. It is noteworthy that most of the up-DEG genes regulated by  
350 the BAH-PHD-CPL2 complex display very low expression levels in the wild-type,  
351 which is a similar pattern to that the *clf* and *lhp1* mutants (Fig. 4b). Under a strict  
352 criterion, 155 genes were commonly up-regulated in the *bah-phd-cpl2* mutants (Fig.  
353 4c, 4d, Supplementary Table 3), and a substantial subset are stress-responsive genes  
354 (Supplementary Fig. 9), such as *SEC31A* (*AT1G18830*), which participates in  
355 endoplasmic reticulum stress responses<sup>55, 56, 57</sup>, and *AGO5* (*AT2G27880*), which is  
356 involved in antiviral RNA silencing<sup>58, 59, 60</sup> and gametophyte development<sup>61, 62</sup>. In fact,  
357 for most of the *aipp2-1/paipp2-1* up-DEGs, higher expression was also observed in the  
358 *aipp3-1* and *cpl2-2* mutants (Fig. 4d), indicating that the BAH-PHD-CPL2 complex  
359 targets a common subset of genes for repression.

360

361 We next explored the chromatin feature of the target genes by plotting the distributions  
362 of the histone marks on the up-DEGs using published histone modifications ChIP-seq  
363 data<sup>63</sup>. As expected, the H3K27me3 mark was heavily enriched on the bodies of the  
364 common target genes (Fig. 4e). Consistent with the ITC result in which the higher  
365 methylation of H3K4 inhibits the binding of PAIPP2-PHD (Fig. 3i), the levels of active  
366 H3K4me3 mark were lower in the regions around the TSS. H3K36me3 deposition was  
367 also low on the whole gene bodies. The depositions of H3K9me2 and H3K27me1 were  
368 markedly lower on the target genes, suggesting that the BAH-PHD-CPL2 complex  
369 primarily targets euchromatic genes. The distribution patterns of H3K27me3 and  
370 H3K4me3 marks at BPC complex target genes were confirmed by ChIP-qPCR assays  
371 at representative target genes *AGO5*, *SUC5* and *FT* (Fig. 4f, g). We next investigated  
372 the impacts of BPC complex dysfunction on global histone mark levels. Interestingly,  
373 compared to the reduction of global H3K27me2/3 levels in *clf-81* mutant, the absence  
374 of the BPC complex did not result in obvious changes in global levels of  
375 H3K27me1/2/3 and H3K4me1/2/3 (Supplementary Fig. 10a). Consistent with this  
376 pattern, H3K27me3 deposition was not obviously changed between Col-0 and *bpc*  
377 mutants at selected target genes *AGO5*, *SUC5* and *FT* (Fig. 4g), whereas H3K4me3  
378 levels are slightly increased (Fig. 4h). To further verify this observation, more target  
379 genes were selected. As shown in Supplementary Fig. 10b-d, nuclear run-on assay  
380 showed that *AT1G43570*, *AT3G59480* and *AT3G53650*, indicating that these three  
381 genes are subjected to BPC complex-mediated transcriptional repression. Interestingly,  
382 ChIP-qPCR results indicated that H3K27me3 levels were not obviously changed in *bpc*

383 mutants at *AT2G43570* and *AT3G59480*, consistent with our observation at *AGO5*,  
 384 *SUC5* and *FT* (Fig. 4g). While, H3K27me3 deposition showed significant reduction at  
 385 *AT3G53650*, implying that BPC dysfunction has substantial impacts on H3K27me3  
 386 deposition at this gene. Combined with these data, we speculate that, for most target  
 387 genes, the BPC complex may serve as a surveillance system to prevent reactivation of  
 388 H3K27me3-marked genes which are already silenced by PRC2, but in some specific  
 389 genes, BPC is required for H3K27me3 through unknown mechanism.

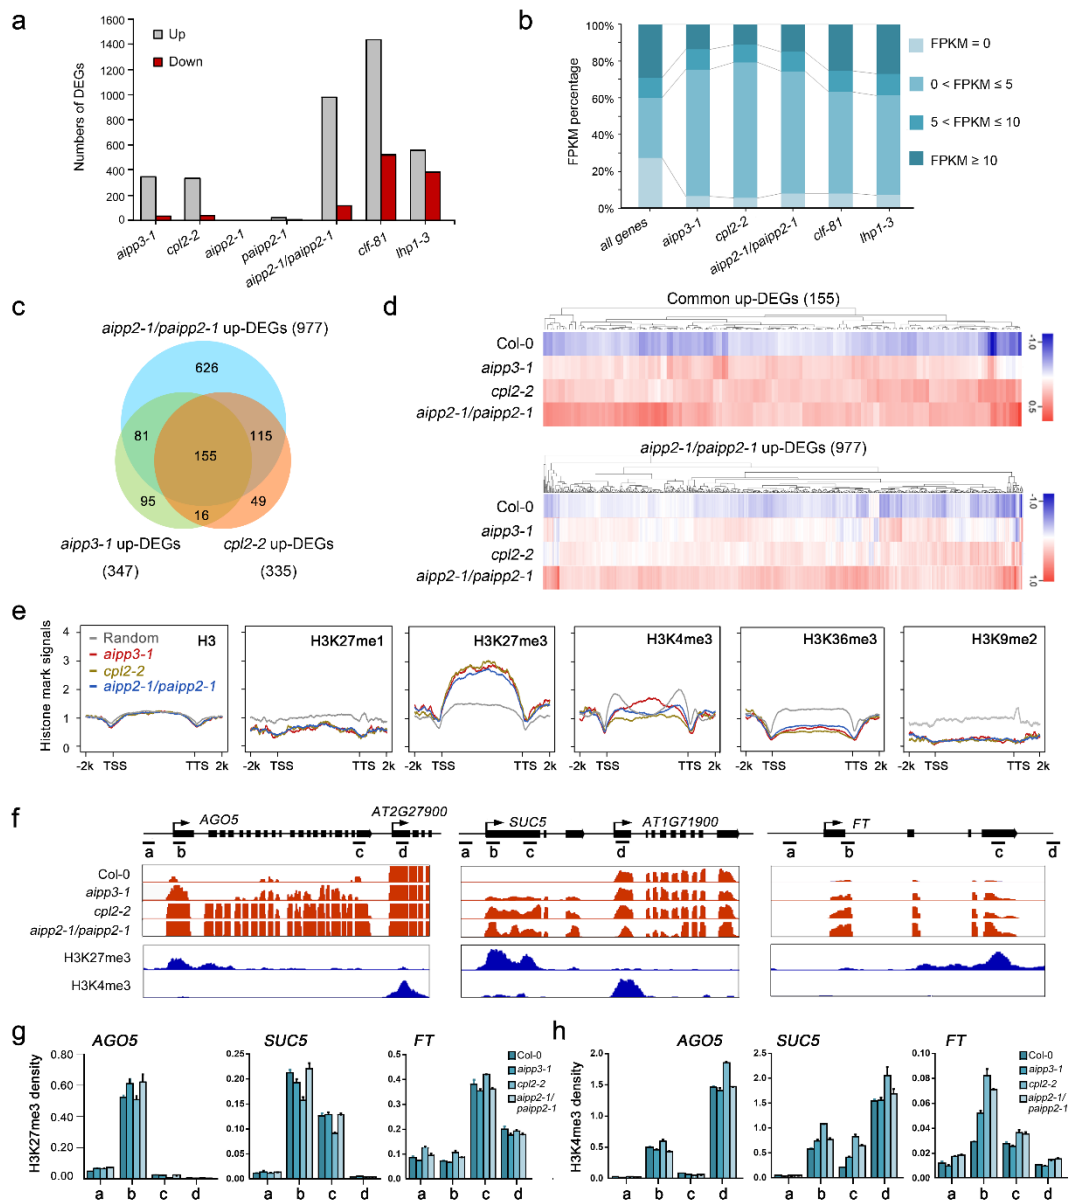

390

391 **Fig. 4. BAH-PHD-CPL2 complex represses the expression of H3K27me3-enriched**  
 392 **genes.** **a** The numbers of up- and down-DEGs identified in the selected mutants. A two-  
 393 fold cutoff was used for the DEG criterion. **b** The BAH-PHD-CPL2 complex primarily  
 394 represses low-expression genes. The gene expression levels of up-DEGs were classified  
 395 into four groups according to their FPKM values in Col-0 mRNA-seq. All the annotated  
 396 genes serve as controls. **c** A Venn diagram showing the overlap of up-DEGs between



397 the selected mutants. **d** A heatmap showing the expression analysis in selected mutants.  
398 The genes in the upper and lower panels represent the common 155 up-DEGs and up-  
399 DEGs of *aipp2-1paipp2-1*, respectively. **e** The distribution of different histone marks  
400 in the respective up-DEGs of selected mutants. TTS, transcription termination site. **f**  
401 Snapshots showing the expression of the selected target genes. One representative  
402 replicate of mRNA-seq and histone ChIP-seq are shown. The adjacent genes with high  
403 H3K4me3/low H3K27me3 were also shown as parallel controls. **g-h** ChIP-qPCR  
404 showing the H3K27me3 (**g**) and H3K4me3 (**h**) density at the selected target genes. The  
405 ChIP signals were normalized to histone H3. The data are means  $\pm$ S.D. of three  
406 technical repeats. One representative result of three biological replicates is shown. The  
407 lowercase letters represent the ChIP-qPCR examined regions as shown in (**f**).  
408

#### 409 **The BAH-PHD-CPL2 complex reads the H3K27me3 at a genome-wide level**

410 We next investigated the interplay between the BAH-PHD-CPL2 complex and the  
411 chromatin of the target genes by performing a ChIP assay in epitope-tagged transgenic  
412 plants. The ChIP-qPCR results indicated that AIPP3, AIPP2 and PAIPP3 were enriched  
413 in the selected target genes, particularly in the regions close to TSSs (Fig. 5a), but they  
414 were low in the adjacent high H3K4me3/low H3K27me3 genes. To confirm this point,  
415 an AIPP3 ChIP-seq was performed. As shown in Fig. 5b, AIPP3 specifically binds to  
416 the selected target genes. At the genome-wide level, AIPP3 binding peaks were  
417 enriched in the DEGs that were up-regulated in the *aipp3-1* mutant (Fig. 5c, d).  
418 Moreover, a pattern of high H3K27me3 and low H3K4me3 was clearly observed in  
419 AIPP3-bound genes (Fig. 5e). Next, we compared the genome-wide occupancy of  
420 AIPP3 with a published global analysis of the H3K27me3-marked regions<sup>1</sup>. As shown  
421 in Fig. 5f, 455 loci, or approximately half of the AIPP3-enriched loci, significantly  
422 overlap with H3K27me3-enriched loci, indicating that a substantial part of the  
423 H3K27me3 loci were targeted by the AIPP3 complex. In *Arabidopsis*, EMBRYONIC  
424 FLOWER 1 (EMF1) is a plant-specific PRC1 component that is essential for conferring  
425 H3K27me3-dependent silencing at thousands of loci<sup>29</sup>. Recently, EMF1 has been  
426 shown to interact with two H3K27me3 readers to form the BAH-EMF1 complex and  
427 implement silencing<sup>29</sup>. We compared the AIPP3 loci with the published EMF1-bound  
428 loci and found that approximately 59% of AIPP3-enriched loci were also occupied by  
429 EMF1 (Fig. 5f). While, no EMF1 peptides were found in the BPC complex co-purified  
430 proteins (Supplementary Table 1). One possible explanation is that both EMF1 and  
431 AIPP3 associate with H3K27me3 mark independently, although the possibility of  
432 indirect association between these two reader proteins cannot be excluded.

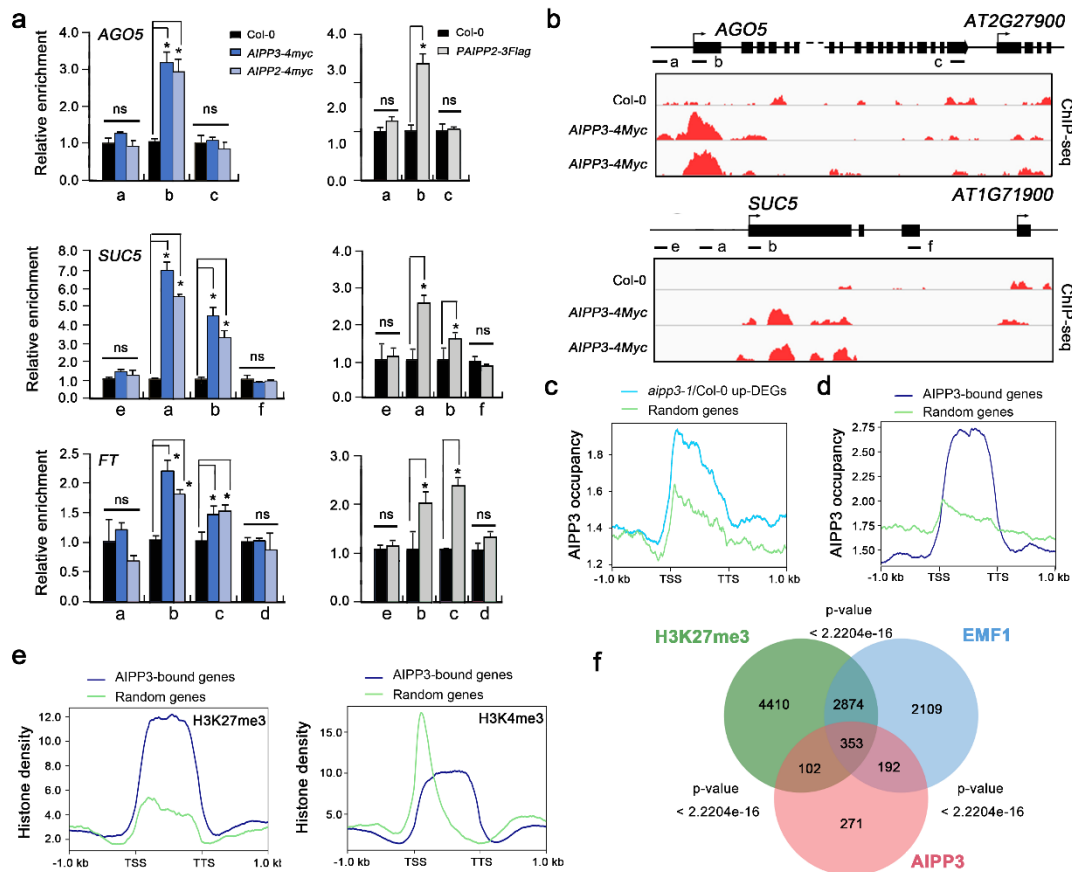

433

434 **Fig. 5. BAH-PHD-CPL2 complex binds to the H3K27me3-marked genes to repress**  
 435 **the transcriptional initiation and elongation of Pol II. a** ChIP-qPCR showing the  
 436 fold enrichments of AIPP3, AIPP2 and PAIPP2 on the selected genes. The occupancy  
 437 was first normalized to the internal control *AtSNI*, and shown are relative fold  
 438 enrichments compared to Col-0. The data are means  $\pm$ S.D. of three biological repeats.  
 439 Significance analysis (t-test) was performed and \* represent p value < 0.01, p value <  
 440 0.01. **b** Snapshots of AIPP3-4Myc ChIP-seq showing the distribution of the AIPP3  
 441 protein at the selected genes. Note: the ChIP-qPCR and ChIP-seq results of *AIPP3-*  
 442 *4Myc* were from independent samples. **c-d** The diagrams showing AIPP3 occupancies  
 443 on *aipp3-1* up-DEGs (b) and AIPP3-bound genes (c). **e** The diagrams showing the  
 444 H3K27me3 (top) and H3K4me3 (bottom) density on AIPP3-bound genes. Random  
 445 regions serve as negative controls. **f** A Venn diagram showing the overlap between  
 446 AIPP3-bound genes, H3K27me3-enriched genes and EMF1-bound genes.

447

448 To decipher whether H3K27me3 binding is indispensable for flowering time control  
 449 and transcription repression, the wild-type and mutated AIPP3 genomic DNA in which  
 450 the crucial Tyr149, Trp170, and Try172 residues required for H3K27me3 binding were  
 451 mutated into alanine was introduced into the *aipp3-1* mutant under the direction of the  
 452 native promoter to generate *AIPP3*, *W170A* and *Y149A/W170A/Y172A* transgenic  
 453 *Arabidopsis*. The early flowering of the *aipp3-1* mutation was rescued by the wild-type  
 454 *AIPP3* transgene, but not by the *W170A* or *Y149A/W170A/Y172A* transgenes (Fig. 6a,  
 455 6b). Interestingly, compared to the comparable accumulation levels of AIPP3 and

456 W170A proteins in transgenic plants, Y149A/W170A/Y172A protein level was much  
457 lower (Fig. 6c), indicating that Y149A/W170A/Y172A mutation alters the stability of  
458 AIPP3 protein. Therefore, we used *AIPP3* and *W170A* transgenes in the following  
459 experiment. RT-qPCR results indicated that the W170A mutation could not recover the  
460 repressive state of the selected target genes (Fig. 6d), suggesting that the H3K27me3-  
461 binding activity is essential for the repression of flowering and gene expression. To test  
462 whether W170A mutation has an impact on AIPP3 binding at target genes, ChIP-qPCR  
463 assay was performed in Col-0, *AIPP3* and *W170A* transgenic plants. As shown in Fig.  
464 6e, compared to the significant enrichment at selected target genes in *AIPP3* transgene,  
465 AIPP3 binding was disrupted by the W170A mutation. Considering the fact that W170  
466 is essential for H3K27me3 binding activity (Fig. 3h), this result strengthens our  
467 conclusion that H3K27me3 binding activity is indispensable for AIPP3-mediated  
468 flowering time control and transcriptional repression. Interestingly, the mutations did  
469 not affect the AIPP3 interactions with AIPP2 and PAIPP2 (Supplementary Fig. 11),  
470 indicating that the BAH-PHD-CPL2 complex is not dissociated by the disabling of  
471 H3K27me3-binding.

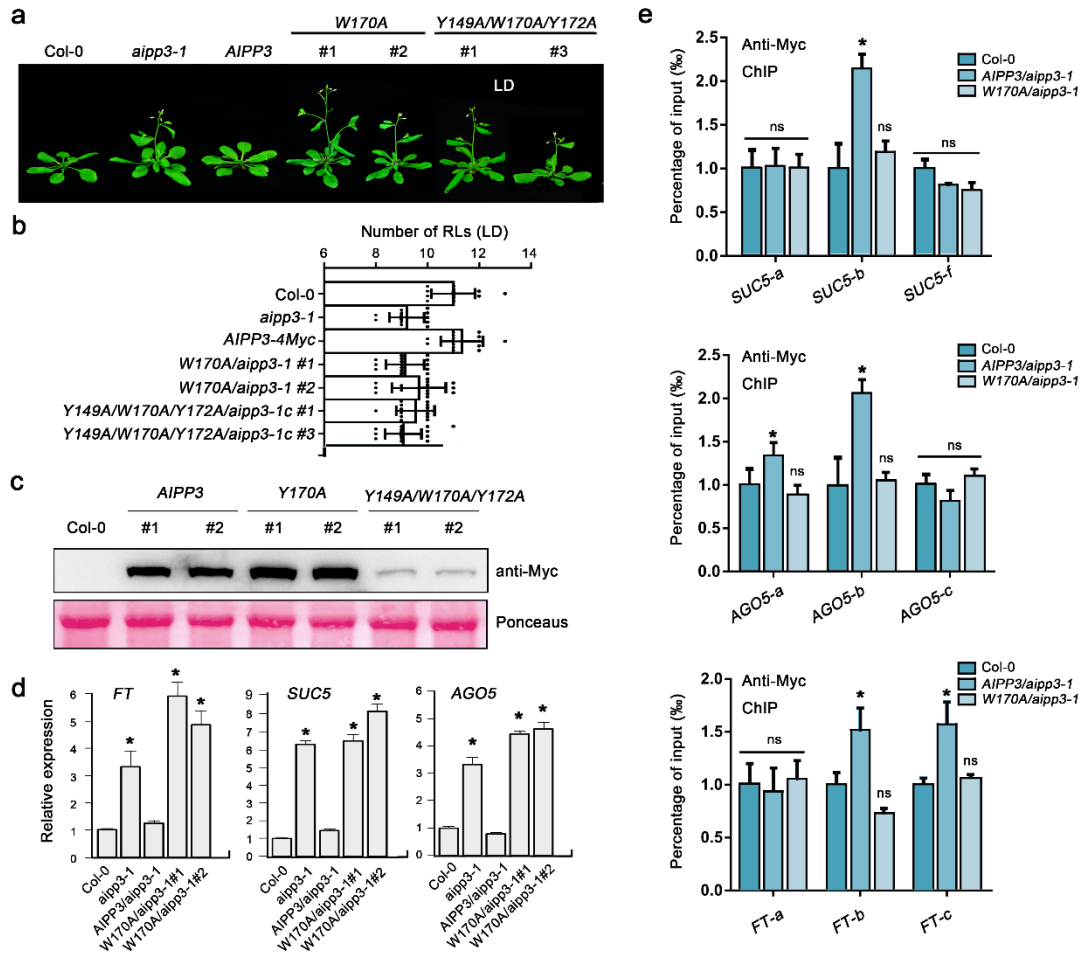

472

473 **Fig. 6. The H3K27me3-binding activity is essential for AIPP3-mediated repression**  
474 **of flowering and gene expression.** **a**, the flowering phenotypes of the *aipp3-1* mutant  
475 for its complementary lines when transformed with the wild-type *AIPP3* genomic  
476 DNA, mutated *AIPP3* in which the key amino acids for H3K27me3-binding were  
477 mutated. For the mutated transgene, two randomly selected transgenes were used for  
478 the analysis. The plants were grown under LD. **b**, the column showing the numbers of  
479 rosette leaves (LDs) of different *AIPP3* transgene plants upon flowering under the LD  
480 condition. **c**, Western blotting result showing the accumulation levels of AIPP3 proteins  
481 in different transgenes. Ponceaus staining serves as protein loading controls. **d**, The  
482 relative mRNA levels of the selected target genes of the BAH-PHD-CPL2 complex in  
483 the wild-type, *aipp3-1* and different *AIPP3* transgene plants. Their levels are presented  
484 relative to Col-0. The data are the means  $\pm$ S.D. of three biological repeats. Significance  
485 analysis (t-test) was performed and \* represent p vale <0.01. **e**, ChIP-qPCR resulting  
486 showing AIPP3 occupancy at the selected target genes in *AIPP3* and *W170A* transgenes.  
487 The data are the means  $\pm$ S.D. of three biological repeats. Significance analysis (t-test)  
488 was performed and \* represent p vale <0.01. ns, no significance.

489

490 **BAH-PHD-CPL2 couples the recognition of H3K27me3 and the repression of Pol**  
491 **II release**

492 It has been well documented that differential phosphorylation on the Ser (Ser2P) and

493 Ser5 (Ser5P) of the Pol II CTD plays essential roles in the switches between distinct  
494 transcriptional stages<sup>64</sup>. During transcription, Pol II is first assembled at the promoter  
495 region. After initiation, Pol II is phosphorylated at Ser 5 and Ser 2 and is then released  
496 from the proximal promoter region to engage in productive elongation<sup>64, 65</sup>. CPL2 has  
497 been shown to dephosphorylate the CTD-Ser5-PO<sub>4</sub> of Pol II<sup>66</sup>. Therefore, it is  
498 reasonable to hypothesize that the BAH- and PHD-mediated recognition of H3K27me<sub>3</sub>  
499 and unmodified H3K4 directly represses transcription through the CPL2-mediated  
500 dephosphorylation of Pol II. To confirm this hypothesis, we first determined the states  
501 of different forms of Pol II in the target genes. Recently, Zhu et al. revealed Pol II  
502 dynamics with single-nucleotide resolution in *Arabidopsis* using native elongating  
503 transcript sequencing (NET-seq)<sup>67</sup>. Surprisingly, only a sharp peak of unphosphorylated  
504 Pol II signals was observed at the TSS region of the selected target genes, and both the  
505 Ser5P and Ser2P signals were quite low or even undetectable throughout the promoter-  
506 proximal regions and gene bodies (Fig. 7a). By contrast, in the H3K4me<sub>3</sub>-enriched  
507 active expressing genes that were independent from the regulation of the BPC complex  
508 (Fig. 4f), the maximum signals for unphosphorylated Pol II were detected at  
509 approximately + 200 bp and sharply decreased to a very low level, and Ser5P and Ser2P  
510 Pol II peaked in the promoter-proximal regions but decreased to a mild level when  
511 entering the gene body regions (Fig. 7a). These results strongly support the idea that  
512 transcription initiation and subsequent elongation of target genes were repressed in the  
513 wild-type by the BAH-PHD-CPL2 complex. We then checked what happens to the Pol  
514 II occupancy when the complex is absent. Compared to the wild-type, higher  
515 accumulations of Ser5P-Pol II were observed at the selected target genes in *aipp3-1*,  
516 *cpl2-2* and *aipp2-1/paipp2-1* mutants (Fig. 7b), and the Pol II signals maintained high  
517 levels towards the 3' end of the selected genes. Similar to Ser5P-Pol II, the occupancy  
518 of total (unphosphorylated) and Ser2P-Pol II also displayed higher levels at selected  
519 target genes *AGO5*, *SUC5* and *FT* in the *bpc* mutants in comparison with Col-0  
520 (Supplementary Fig. 12). In contrast, the occupancies of all types of Pol II at *AGO5* and  
521 *SUC5* downstream non-target genes were not significantly changed (Supplementary  
522 Fig. 12), demonstrating that *bpc* mutations led to reactivation of Pol II initiation  
523 specifically at BPC complex target genes and the initiated Pol II successfully switched  
524 to an elongating state in the *bpc* mutants. These evidence, combined with the known  
525 knowledge that CPL2 is a Ser5P-Pol II phosphatase, prompts us to hypothesize that the  
526 BPC complex represses gene expression by connecting the BAH-PHD module-

527 mediated recognition of H3K27me3/unmodified H3K4 and the CPL2-mediated  
528 dephosphorylation of Pol II CTD Ser5-PO4.

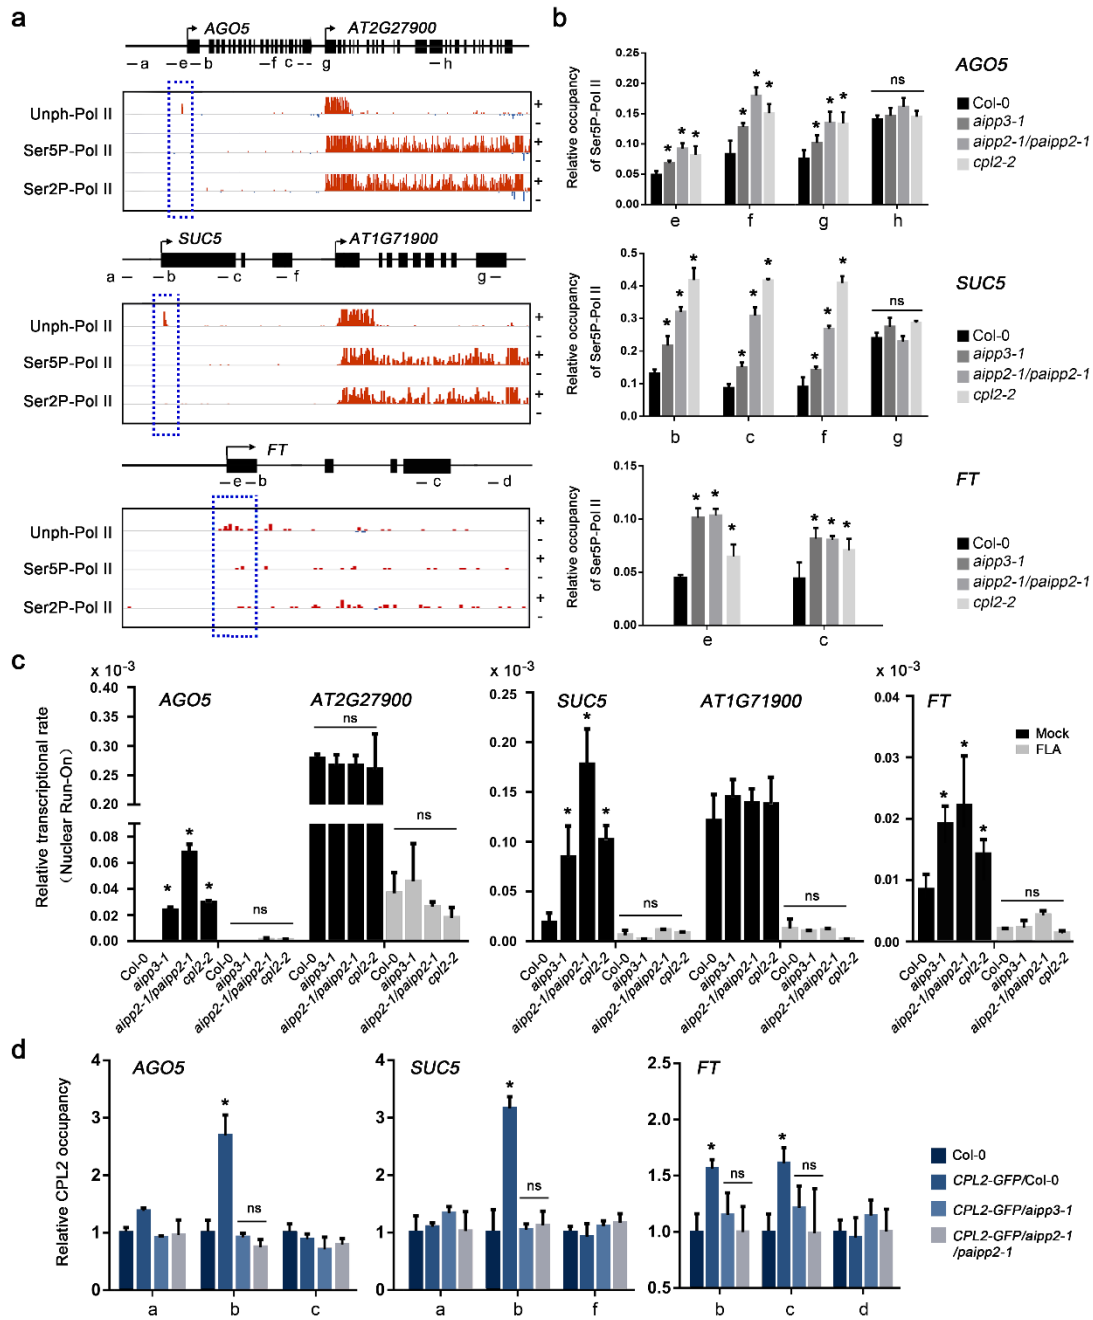

529

530 **Fig. 7 BPC complex directly connects H3K27me3 recognition with transcriptional**  
531 **repression. a** Snapshots showing the occupancies of different Pol II forms on selected  
532 target genes using a published Pol II NET-seq database. The red and blue lines indicate  
533 the Pol II signals in the plus and minus strands, respectively. The dashed red boxes  
534 indicate the occupancies of Pol II on the selected target genes. The black arrows indicate  
535 the transcriptional direction. **b** The ChIP-qPCR validation of the occupancy of Ser5P-  
536 Pol II on selected genes in different mutants. The lowercase letters the examined  
537 regions (the same below). The occupancy was normalized to the *ACT7*. The Data are  
538 the means  $\pm$ S.D. of three biological repeats. Significance analysis (t-test) was  
539 performed and \* represent p value <0.01(the same below). ns, no significance. **c** Nuclear



540 Run-On analysis showing the relative Pol II transcription rate at the selected target  
541 genes in Col-0 and *bpc* mutants with or without FLA treatment (mock). *AT2G27900*  
542 and *AT1G71900* genes serve as control genes. The relative transcription rate was  
543 normalized to 18S rRNA. **d** CPL2 ChIP-qPCR results showing the relative occupancy  
544 of CPL2 at selected target genes in the presence and absence of AIPP3 and  
545 AIPP2/PAIPP2. The occupancy was first normalized to AtSN1 and then normalized to  
546 Col-0. The Data are the means  $\pm$ S.D. of three biological repeats.  
547

548 To support the above hypothesis, flavopiridol (FLA) treatment assay was performed  
549 which can reduce the phosphorylation of Pol II CTD by inhibiting the activity of CDK  
550 kinases<sup>67</sup>, and the nascent RNA levels of the selected target genes were measured by  
551 Nuclear Run-On assay. The results indicated that the nascent RNA levels of *AGO5* and  
552 *SUC5*, but not that of the downstream non-target genes, were dramatically increased  
553 in the *bpc* mutants compared to Col-0 in mock condition. This evidence strongly  
554 supports our conclusion of transcriptional repression implemented by the BPC  
555 complex. In contrast, the nascent RNA levels of both *AGO5*, *SUC5* and the downstream  
556 non-target genes were greatly reduced by FLA treatment, and no significant changes  
557 were observed between different genotypes (Fig. 7c), indicating that inhibition of Pol  
558 II CTD phosphorylation dramatically repressed the transcription reactivation caused by  
559 the malfunctions of the BPC complex. Considering the likelihood of general effects of  
560 FLA treatment on transcriptional at a global level, to strengthen our hypothesis, the  
561 chromatin binding of CPL2 was compared in the presence or absence of AIPP3 and  
562 PHD proteins. To this end, *CPL2-GFP* transgene was crossed into *aipp3-1* and *aipp2-*  
563 *1/paipp2-1* mutants and CPL2 ChIP-qPCR assay was performed in *CPL2-GFP/Col-0*,  
564 *CPL2-GFP/aipp3-1* and *CPL2-GFP/aipp2-1/paipp2-1* plants. The result indicated that  
565 CPL2 has significant binding at selected target genes in wild-type background, whereas  
566 this binding was completely abolished in the *aipp3-1* and *aipp2-1/paipp2-1* mutants  
567 (Fig. 7d). This result provides a link between chromatin marks and CPL2-mediated  
568 dephosphorylation of Pol II, in which the chromatin localization of CPL2 at BPC  
569 complex target genes largely depends on the recognition of H3K27me3/H3K4me0  
570 marks by BAH-PHD proteins. Based on these evidences, we proposed a working model  
571 of the transcriptional repression conferred by the BPC complex (Fig. 8). In this model,  
572 the BAH-PHD bivalent histone reader recognizes H3K27me3 and unmodified H3K4  
573 marks and recruits CPL2 to dephosphorylate the Ser5P of Pol II CTD, resulting in the  
574 inhibition of Pol II release from a transcriptional initiation state to elongation. When  
575 the BPC complex is absent, active H3K4me3 mark is deposited at BPC target genes.

576 The Ser5 and Ser2 residues of Pol II CTD are sequentially phosphorylated, leading to  
577 transcriptional reactivation of BPC target genes.

578

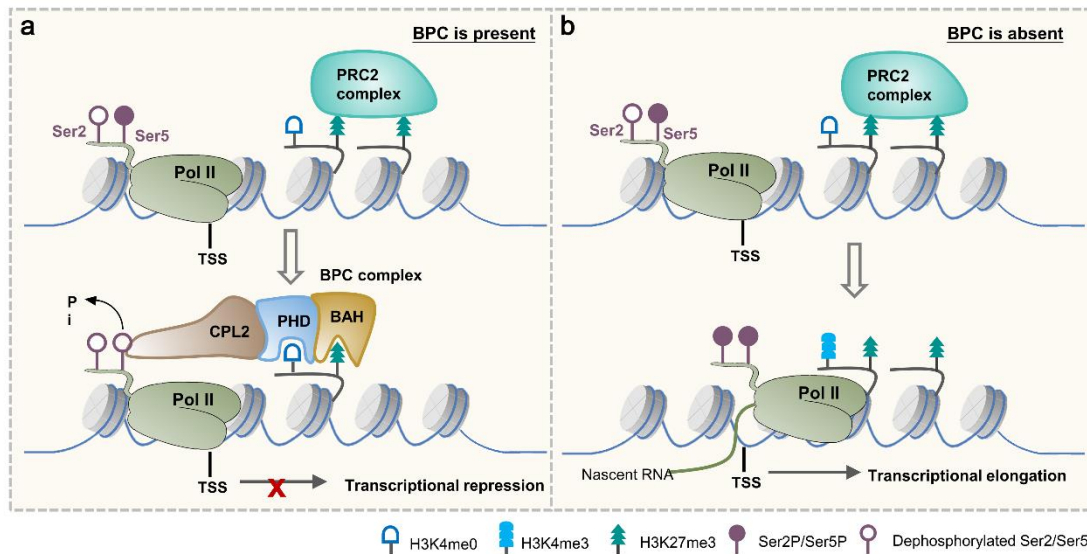

579

580

581 **Fig.8 A working model of the BPC complex-mediated transcription repression.**  
582 When BPC is present, AIPP3-BAH and AIPP2/PAIPP2-PHD motifs recognize  
583 H3K27me3, which is deposited by PRC2 complex, and unmodified H3K4 around the  
584 TSS, respectively. Then, the BAH-PHD histone reader module recruit CPL2 to  
585 dephosphorylate Pol II at the 5<sup>th</sup> Ser of CTD, thereby repressing the transcriptional  
586 initiation and subsequent elongation of Pol II. When BPC is absent, active H3K4me3  
587 mark is deposited. Pol II CTD Ser2 and Ser5 residues can be phosphorylated  
588 sequentially, leading to release of Pol II from initiation to elongation state.

589

## 590 DISCUSSION

### 591 BAH and PHD proteins form a bivalent histone reader complex for H3K27me3 592 and H3K4me0 marks

593 Recently, we structurally described several plant H3K27me3-reading BAH domain  
594 proteins, such as EBS, SHL and AIPP3 in this research<sup>27, 28</sup>, which has encouraged us  
595 to characterize the H3K27me3-reading BAH domains. The recognitions of H3K27me3  
596 by all these BAH domains depend on the aromatic cage to recognize the methyl-lysine,  
597 and a histidine and an aspartic acid residue to specifically interact with H3P30 for  
598 sequence specificity. Using the aromatic cage and the specific His and Asp residues as  
599 a criterion, we identified a subfamily of BAH domain proteins that can potentially  
600 recognize the H3K27me3 mark, which are widely distributed in plants, fungi, and  
601 animals (Supplementary Fig. 13). Interestingly, the predicted H3K27me3-binding BAH  
602 domain-containing protein human BAHD1 was reported to be an H3K27me3 reader<sup>30</sup>,

603 which further supported our prediction. Therefore, we believe that the aromatic cage  
604 and conserved His and Asp residues are the key features of H3K27me3-recognition  
605 BAH domains.

606

607 Different histone marks do not function in a totally independent manner. Instead, they  
608 engage in communications and cooperation with each other. The cooperation between  
609 different histone marks can be a combinatorial reading to enhance binding or be  
610 mutually exclusive to balance the binding between different marks, which occurs at  
611 both the single protein level and the multiple protein complex level<sup>68</sup>. Recently, we  
612 reported that the two flowering regulators EBS and SHL could dynamically recognize  
613 the antagonist histone marks H3K27me3 and H3K4me3 at the single protein level to  
614 regulate floral phase transitions<sup>27, 28</sup>. Here, AIPP3 and AIPP2/PAIPP2 could recognize  
615 H3K27me3 and H3K4me0, respectively, and form a bivalent histone reader complex.  
616 This observation is consistent with our functional data showing that the BAH-PHD-  
617 CPL2 complex colocalizes with higher H3K27me3 and lower H3K4me3 marked  
618 chromatin regions. The BAH domain of AIPP3 is responsible for the colocalization of  
619 the complex with H3K27me3. The binding of unmodified H3K4 by the PHD finger of  
620 AIPP2/PAIPP2 may have two roles. First, the binding of unmodified H3K4 may  
621 prevent the binding towards methylated H3K4 to make sure the complex is targeted to  
622 the gene repressive H3K4me3 depletion region. Second, the binding of H3K4me0  
623 together with the H3K27me3 binding by AIPP3 may combine to enhance the overall  
624 binding of the complex towards a certain chromatin region. Therefore, the proper  
625 targeting of the BAH-PHD-CPL2 complex relies on the crosstalk between the  
626 H3K4me0 and H3K27me3 marks.

627

### 628 **Coupling H3K27me3 recognition and transcription repression through the CPL2-** 629 **mediated dephosphorylation of Pol II**

630 RNA Pol II-dependent transcription is a stepwise process involving the formation of  
631 the preinitiation complex (PIC), initiation, elongation and polyadenylation/termination  
632 stages. Each of the stages is associated with a distinct pattern of CTD phosphorylation<sup>8</sup>.  
633 <sup>65</sup>. The transcriptional machinery is first recruited to the promoter regions. Once  
634 incorporated into the PIC, the mediator stimulates cyclin-dependent kinase to  
635 phosphorylate serine 5 of the CTD heptad repeat, and Ser5P helps in the release of Pol  
636 II from the PIC complex, thereby allowing Pol II to escape the promoter and the

637 subsequent initiation of transcription. Ser5P is retained during the first several hundred  
638 nucleotides, in preparation for productive elongation<sup>69</sup>.

639

640 Here, on the selected target genes *AGO5* and *SUC5*, unphosphorylated Pol II is  
641 restricted in the TSS region, whereas Ser5P and Ser2P were below detectable levels  
642 (Fig. 7a), indicating that Ser5P-dependent transcription initiation is inhibited, possibly  
643 by CPL2, in the presence of the BPC complex. Consistent with this notion, the density  
644 of the Ser5P Pol II was significantly increased, and it peaked within the first several  
645 hundred nucleotides in the BPC complex mutants (Fig. 7b), indicating that the Ser5P-  
646 dependent transcription initiation was derepressed. In the canonical model of  
647 H3K27me3-mediated transcription repression, the recognition of H3K27me3 recruits  
648 the PcG proteins in the PRC1 complex to impose the monoubiquitination of H2A,  
649 which represses transcription through three possible mechanisms, as mentioned in the  
650 introduction<sup>8</sup>. Consistent with this model, a recent report showed that the mutations in  
651 H3K27me3 reader proteins LHP1, EBS and SHL in *Arabidopsis* led to a reduction in  
652 H2Aub1<sup>29</sup>. We found that the H2Aub1 levels were reduced in the *lhp1-3* mutant but  
653 were not affected in the *aipp3-1/cpl2-2*, *aipp3-1/aipp2-1/paipp2-1* and *aipp2-1/paipp2-1/cpl2-2*  
654 mutants (Supplementary Fig. 10a). This observation is consistent with our  
655 hypothesis that the BPC complex represses transcription mainly through the inhibition  
656 of Ser5P-dependent transcription initiation. While, we cannot rule out the possibility  
657 that BPC the complex has direct/indirect interaction with H2Aub1 at specific target  
658 genes. This study unveiled a direct connection between H3K27me3 recognition and  
659 transcription repression; the BAH-PHD module recognizes H3K27me3/H3K4me0 and  
660 recruits CPL2 to dephosphorylate Pol II CTD, resulting in the failure of Pol II to enter  
661 into the initiation and elongation form. Although Pol II CTD phosphatases are  
662 conserved in eukaryotes, no evidence shows that histone modifiers manipulate CTD  
663 phosphatases, including CPL2 analogies in other systems, to affect transcription.  
664 Regarding histone modifiers, several studies have reported that histone PTM modifiers  
665 can affect transcription via modulating Pol II CTD phosphorylation state<sup>70, 71</sup>. JMJD3,  
666 a H3K27me3 demethylase in human, has been shown to directly interact with CTD-  
667 Ser2P to affect gene expression<sup>72</sup>. Knocking down JMJD3 or JHDM1D, a H3K27me1/2  
668 demethylase, reduces the enrichment of Pol II CTD-Ser2P at specific genes in human  
669 promyelocytic leukemia cells<sup>73</sup>. In addition to histone methylation, other histone PTMs  
670 including histone ubiquitylation and phosphorylation, are also associated with Pol II

671 CTD phosphorylation-dependent transcriptional elongation<sup>71</sup>. For example, knocking  
672 down histone ubiquitylation modifiers has been shown to affect CTD-Ser2  
673 phosphorylation<sup>71</sup>. The phosphorylation of histone H3 on S10 and S28 has been  
674 reported to be associated with phosphorylated Pol II during transcriptional activation  
675 in humans and *Drosophila*<sup>74, 75</sup>. These studies support a notion that modulation of Pol  
676 II CTD phosphorylation represents an important regulatory mechanism adopted by  
677 chromatin regulators to regulate gene expression. Our finding that the BPC complex  
678 reading histone information and conferring transcriptional repression through CPL2  
679 phosphatase-mediated modulation of Pol II CTD phosphorylation state provides a  
680 direct evidence to support this notion. Considering that CPL2 is a plant-specific Pol II  
681 phosphatase that bears a unique RBM domain, and that this domain is required for its  
682 interaction with PHD proteins (Fig. 1c), the BAH-PHD-CPL2 pathway may represent  
683 a newly evolved silencing pathway in plants. Our findings suggest a greater complexity  
684 and diversity of H3K27me3-mediated transcriptional regulation. In addition, it is well-  
685 known that H3K27me3-mediated silencing mechanisms participate in multiple  
686 biological processes in both plant and animals, particularly development and stress  
687 responsive genes. The obvious developmental defects (Fig. 2a) and reactivation of  
688 many development- and stress response-related genes (Supplementary Fig. 9) in *bpc*  
689 mutants imply that the BPC complex may play more important roles in plant  
690 development and stress responses in addition to flowering time control.

691

## 692 **METHODS**

### 693 **Plant materials and growth conditions**

694 All the plant seeds were sown and grown on 1/2 MS medium containing 1% sucrose.  
695 The seedlings were grown under a long- (16 h light/8 h dark) or short-day (8 h light/16  
696 h dark) photoperiod at 23 °C. The T-DNA insertion mutants *aipp2-1*, *aipp3-1* and *cpl2-2*  
697 were described in our previous study<sup>41</sup>. The *paipp2-1* mutant was generated by  
698 CRISPR/Cas9-mediated mutagenesis in a Col-0 background (Supplementary Fig. 4).  
699 *clf-81* and *lhp1-3* have been described previously<sup>53, 54</sup>. For the epitope-tagged  
700 transgenic expression of the *AIPP2*, *AIPP3*, *PAIPP2* and *CPL2* genes, the wild-type  
701 and mutated genomic DNA driven by their native promoters were cloned into binary  
702 vectors with different tags and then transformed into the corresponding mutants using  
703 the flowering dip method. T3 generation transgenic plants were used for analysis.  
704 FLA treatment assay was performed as previous report<sup>67</sup>. In brief, two-week-old



705 seedlings were collected and incubated with 200  $\mu$ M FLA or mock solution (DMSO)  
706 overnight. The treated seedlings were subjected to total RNA extraction.

707

#### 708 **RT-qPCR and RNA-seq analysis**

709 Total RNA was extracted from 2-week-old seedlings using Trizol reagent (Thermo),  
710 and cDNAs were synthesized using HiScript II Reverse Transcriptase (Vazyme).  
711 Quantitative PCR was performed using a CFX96 Touch Deep Well Real-Time PCR  
712 Detection System (Bio-Rad). Three biological replicates were created. The primers  
713 used in this study are listed in Supplementary Table 4. For the RNA-seq analysis, total  
714 RNAs were extracted from 12-day-old seedlings grown during long days using a  
715 RNeasy Plant Mini kit (Qiagen). Following RNA purification, reverse transcription and  
716 library construction, the libraries were quantified by TBS380, and a paired-end RNA  
717 sequencing library was performed with Illumina NovaSeq 6000 (2 $\times$ 150 bp read length).  
718 The raw paired-end reads were trimmed and subject to quality control with SeqPrep  
719 (<https://github.com/jstjohn/SeqPrep>) and Sickle (<https://github.com/najoshi/sickle> )  
720 using the default parameters.

721

#### 722 **IP and mass spectrometry analysis**

723 Immunoprecipitation and mass spectrometry analyses were performed as previously  
724 described<sup>76</sup>. In brief, the total proteins were extracted from the inflorescence tissues  
725 with IP buffer (50 mM Tris-HCl, pH 7.6, 150 mM NaCl, 5 mM MgCl<sub>2</sub>, 10% Glycerol,  
726 0.1% NP-40, 0.5 mM DTT, and protease inhibitor cocktail) and then precipitated with  
727 anti-Flag (Sigma-Aldrich) or anti-Myc (Millipore) antibodies for 2 h at 4 °C. The  
728 precipitated protein mixtures were subjected to MS analysis.

729

#### 730 **Protein interaction analysis and gel filtration assays**

731 For the Y2H assays, the full-length and truncated coding sequences of *AIPP2*, *AIPP3*,  
732 *CPL2* and *PAIPP2* were cloned into the pGADT7 and pGBKT7 vectors to generate AD  
733 and BD constructs. After the transformation, the yeast cultures were spotted onto SD  
734 plates lacking Trp and Leu (-LW) or lacking Trp, Leu and His (-LWH) and incubated  
735 at 30 °C for 3 d.

736

737 Gel filtration assays were performed as described previously<sup>76</sup>. In brief, the total  
738 proteins were extracted from 4 g of seedling tissues expressing *AIPP3-FLAG*, *AIPP2-*



739 *4MYC*, *PAIPP2-3FLAG* and *CPL2-4MYC* with IP buffer and then loaded on to a  
740 Superdex 200 10/300GL column (GE Healthcare). The eluted fractions were collected  
741 in 96-well plates and the target proteins were detected by standard western blotting.

742

### 743 **Protein expression and purification**

744 The sequence containing the AIPP3-BAH domain (residues 112-279) was constructed  
745 into a self-modified pMal-p2X vector to fuse a hexahistidine tag plus a maltose-binding  
746 protein (MBP) tag to the N-terminus of the target protein. The plasmids were trans-  
747 formed into *Escherichia coli* strain BL21 (DE3) RIL (Stratagene). Expression was in-  
748 duced at 16 °C overnight with 0.2 mM of IPTG. The recombinant proteins were purified  
749 with a pre-packaged HisTrap FF column (GE Healthcare). The His-MBP tags were  
750 cleaved by TEV protease overnight and removed by flowing through a HisTrap FF col-  
751 umn (GE Healthcare) again. The target protein was further purified using a Heparin  
752 column (GE Healthcare) and a Superdex G200 column (GE Healthcare). All the AIPP3-  
753 BAH mutations were generated by standard PCR-based mutagenesis procedure. The  
754 mutations of AIPP3-BAH and truncated AIPP2/PAIPP2 fragments were purified using  
755 the same protocols as those used for the wild-type AIPP3-BAH. For the GST-AIPP3-  
756 BAH proteins used in histone peptide pull-down assays, the wild-type and mutated  
757 AIPP3-BAH proteins were purified with glutathione-Sepharose (GE Healthcare) and  
758 eluted with elution buffer (50 mM Tris-HCl pH 8, and 10 mM reduced glutathione).  
759 The peptides were purchased from GL Biochem or EpiCypher.

760

### 761 **Histone peptide pull-down**

762 Histone peptide pull-down was performed according to a previous report<sup>27</sup>. In brief, 1.5  
763 µg of biotinylated histone peptides were incubated with streptavidin beads (NEB) in  
764 binding buffer (50 mM Tris-HCl 8.0, 300 mM NaCl, 0.1% NP-40) for 1 h at 4 °C and  
765 then washed with binding buffer. A 1.5 µg quantity of AIPP3-BAH proteins was incu-  
766 bated with a peptide-bead mixture in 0.5 ml of binding buffer for 3 h at 4 °C and then  
767 washed with binding buffer five times. The protein-bead mixtures were subjected to  
768 immunoblotting using anti-GST antibody (Abmart).

769

### 770 **Chromatin immunoprecipitation assays and ChIP-Seq analysis**

771 ChIP assays were performed according to a reported procedure<sup>77</sup>. In brief, 3 g of seed-  
772 lings was harvested and fixed with 1% formaldehyde in the cross-linking buffer (0.4 M

773 sucrose, 10 mM Tris-HCl pH 8, 1 mM PMSF, and 1 mM EDTA). After nuclei isolation  
774 with isolation buffer (0.25 M sucrose, 15 mM PIPES pH 6.8, 5 mM MgCl<sub>2</sub>, 60 mM  
775 KCl, 15 mM NaCl, 1 mM CaCl<sub>2</sub>, 0.9% Triton X-100, and protease inhibitor cock-  
776 tail) and the following centrifugation, nuclei were resuspended in 500 µl of lysis buffer  
777 (50 mM HEPES pH 7.5, 150 mM NaCl, 1 mM EDTA, 1 mM PMSF, 1% SDS, 0.1% Na  
778 deoxycholate, 1% Triton X-100, and protease inhibitor cocktail) and sonicated with a  
779 Bioruptor (Diagenode). The nuclei lysate was precipitated with anti-Flag (Sigma-Al-  
780 drich), anti-Myc (Millipore), anti-H3 (Abcam), anti-H3K27me<sub>3</sub> (Millipore), Ser2P-Pol  
781 II (Abcam), Ser5P-Pol II (Abcam) and unphosphorylated Pol II (Abcam) antibodies  
782 overnight and incubated with Dynabeads (Thermo) for 2 h. The precipitated protein-  
783 DNA mixtures were washed and eluted with elution buffer (0.5% SDS and 0.1 M Na-  
784 HCO<sub>3</sub>) at room temperature. The DNA was recovered after reverse cross-linking and  
785 proteinase K treatment.

786

787 For ChIP-Seq analysis, clean reads were mapped to the *Arabidopsis thaliana* genome  
788 (TAIR10) by Bowtie2 (version 2.2.8) with default parameters<sup>78</sup>. Enriched peaks were  
789 identified by MACS (version 1.4) with default parameters. We defined the region of a  
790 target gene as the range from 1 kb upstream of TSS to TTS. The target genes of each  
791 peak were annotated by annotatePeak function in ChIPseeker package. The visualiza-  
792 tion of the average read coverage over gene body and additional 1kb up- and down-  
793 stream of the TSS and TES was performed by deepTools (version 2.4.1)<sup>79</sup>.

794

### 795 **Crystallization, data collection and structure determination**

796 Crystallization screening was performed using the sitting drop vapor diffusion method  
797 at 4 °C. The sample was concentrated and mixed with peptide at a molar ratio of 1:4.  
798 All the crystals emerged in a solution of 0.1 M HEPES, pH 7.0, and 2.4 M ammonium  
799 sulfate. The crystals were cryo-protected in the reservoir solution supplemented with  
800 20% glycerol and flash-cooled in liquid nitrogen for X-ray diffraction. All the diffrac-  
801 tion data were collected at beamline BL19U1 of the National Center for Protein Sci-  
802 ences Shanghai (NCPSS) at the Shanghai Synchrotron Radiation Facility (SSRF). The  
803 data were processed with the HKL3000 program<sup>80</sup>. The structure was determined by  
804 molecular replacement method as implemented in the Phenix program<sup>81</sup> using the  
805 ZMET2 BAH domain (PDB ID: 4FT2) as the searching model<sup>20</sup>. Model building and

806 structure refinement were performed using the Coot and Phenix programs, respec-  
807 tively<sup>81, 82</sup>. The statistics of data collection and structure refinement are listed in Sup-  
808 plementary Table 2.

809

### 810 **Isothermal titration calorimetry**

811 All the binding experiments were performed on a Microcal PEAQ-ITC instrument  
812 (Malvern) at 25 °C. The proteins were dialyzed against a buffer consisting of 50 mM  
813 NaCl and 20 mM Tris-HCl, pH 7.5 overnight at 4 °C. The lyophilized peptides were  
814 dissolved into the dialysis buffer. The titration was performed using the standard pro-  
815 tocol and the data were processed using the Origin 7.0 program.

816

### 817 **Nuclear Run-On assay**

818 Nuclear Run-On assay was performed as previous report with minor changes<sup>83</sup>. In  
819 brief, after nuclei isolation with buffer (0.25 M sucrose, 15 mM PIPES pH 6.8, 5 mM  
820 MgCl<sub>2</sub>, 60 mM KCl, 15 mM NaCl, 1 mM CaCl<sub>2</sub>, 0.9% Triton X-100, and protease  
821 inhibitor cocktail), the nuclear pellet was resuspended with nuclei storage buffer (50  
822 mM Tris-HCl pH 8, 0.1 mM EDTA, 5 mM MgCl<sub>2</sub> and 40% glycerol) and mixed with  
823 transcription buffer (10 mM Tris-HCl, pH 8, 2.5 mM MgCl<sub>2</sub>, 150 mM KCl, 2 mM DTT,  
824 80 units RNase inhibitor, 0.5 mM BrUTP, 1 mM ATP, 1 mM GTP, 1 mM CTP, 0.5 mM  
825 UTP and 0.2% sarkosyl). After incubation at 30 °C for 15 min, the run-on reaction was  
826 stopped by adding Trizol reagent (Thermo). The nuclear RNAs were extracted and  
827 treated with DNase. The DNA-free RNAs were then inoculated with 2 µg anti-BrdU  
828 antibody (abcam) at room temperature for 30 min and precipitated by Dynabeads  
829 (Thermo). After two times washing, RNAs were extracted using Trizol reagent  
830 (Thermo). cDNAs were synthesized using SuperScript IV Reverse Transcriptase  
831 (Thermo) and subjected to qPCR analysis.

832

833 **Reporting summary.** Further information on research design is available in the Nature  
834 Research Reporting Summary linked to this article.

835

### 836 **Data availability**

837 Coordinates and structure factors have been deposited in the RCSB Protein Data Bank  
838 with the accession code: 7CCE. The ChIP-Seq and mRNA-seq data have been depos-  
839 ited in the GEO with the accession codes GSE147981 and GSE157196, respectively.

840 Supplementary Table 1 is provided as a Supplementary Data file. All other data are  
841 available from the corresponding authors on request.

842

### 843 **Author contributions**

844 C.-G.D., J.D. and J.-K.Z. designed this study. Y.Z., J.Y., L.Z., Y.W., G.Z. and Si-Si Xie  
845 conducted the experiments. Y.Z., J.Y., L.Z., J.J., J.D., J.K.Z. and C.-G.D. analyzed the  
846 data. C.C. and P.L. performed bioinformatic analysis. J.D., J.K.Z. and C.-G.D. wrote  
847 the paper.

848

### 849 **Competing interests**

850 The authors declare no competing interests.

851

### 852 **Acknowledgments**

853 We thank Dr. Yuehui He for the seeds of *clf-81*, *lhp1-3* and *flc-3* mutants. We thank  
854 staff at beamline BL19U1 of the National Center for Protein Sciences Shanghai  
855 (NCPSS) at the Shanghai Synchrotron Radiation Facility (SSRF) for data collection.  
856 Dr. C.G.D. was supported by the Strategic Priority Research Program of the Chinese  
857 Academy of Sciences (XDB27040203) and by the National Natural Science  
858 Foundation of China (31570155). Dr. J.K.Z. was supported by the Strategic Priority  
859 Research Program of the Chinese Academy of Sciences(XDB2704). J.D. was supported  
860 by the National Natural Science Foundation of China (31770782), Shenzhen Science  
861 and Technology Program (KQTD20190929173906742), SUSTech (G02226301) and  
862 the Key Laboratory of Molecular Design for Plant Cell Factory of Guangdong Higher  
863 Education Institutes (2019KSYS006).

864

865

### 866 **References**

- 867 1. Kim SY, Lee J, Eshed-Williams L, Zilberman D, Sung ZR. EMF1 and PRC2  
868 cooperate to repress key regulators of Arabidopsis development. *PLoS genetics*  
869 **8**, e1002512 (2012).  
870
- 871 2. Strahl BD, Allis CD. The language of covalent histone modifications. *Nature*  
872 **403**, 41-45 (2000).  
873
- 874 3. Campos EI, Reinberg D. Histones: annotating chromatin. *Annu Rev Genet* **43**,

- 875 559-599 (2009).  
876
- 877 4. Liu C, Lu F, Cui X, Cao X. Histone methylation in higher plants. *Annual review*  
878 *of plant biology* **61**, 395-420 (2010).  
879
- 880 5. Chang YN, Zhu C, Jiang J, Zhang H, Zhu JK, Duan CG. Epigenetic regulation  
881 in plant abiotic stress responses. *Journal of integrative plant biology*, (2019).  
882
- 883 6. Kim DH, Sung S. Polycomb-mediated gene silencing in *Arabidopsis thaliana*.  
884 *Molecules and cells* **37**, 841-850 (2014).  
885
- 886 7. Simon JA, Kingston RE. Mechanisms of polycomb gene silencing: knowns and  
887 unknowns. *Nature reviews Molecular cell biology* **10**, 697-708 (2009).  
888
- 889 8. Aranda S, Mas G, Di Croce L. Regulation of gene transcription by Polycomb  
890 proteins. *Science advances* **1**, e1500737 (2015).  
891
- 892 9. Di Croce L, Helin K. Transcriptional regulation by Polycomb group proteins.  
893 *Nature structural & molecular biology* **20**, 1147-1155 (2013).  
894
- 895 10. Blackledge NP, Rose NR, Klose RJ. Targeting Polycomb systems to regulate  
896 gene expression: modifications to a complex story. *Nature reviews Molecular*  
897 *cell biology* **16**, 643-649 (2015).  
898
- 899 11. Shao Z, *et al.* Stabilization of chromatin structure by PRC1, a Polycomb  
900 complex. *Cell* **98**, 37-46 (1999).  
901
- 902 12. Levine SS, Weiss A, Erdjument-Bromage H, Shao Z, Tempst P, Kingston RE.  
903 The core of the polycomb repressive complex is compositionally and  
904 functionally conserved in flies and humans. *Molecular and cellular biology* **22**,  
905 6070-6078 (2002).  
906
- 907 13. Francis NJ, Kingston RE, Woodcock CL. Chromatin compaction by a polycomb  
908 group protein complex. *Science* **306**, 1574-1577 (2004).  
909
- 910 14. Chopra VS, Hendrix DA, Core LJ, Tsui C, Lis JT, Levine M. The polycomb  
911 group mutant *esc* leads to augmented levels of paused Pol II in the *Drosophila*  
912 embryo. *Molecular cell* **42**, 837-844 (2011).  
913
- 914 15. Zhou W, *et al.* Histone H2A monoubiquitination represses transcription by

- 915 inhibiting RNA polymerase II transcriptional elongation. *Molecular cell* **29**, 69-  
916 80 (2008).  
917
- 918 16. Stock JK, *et al.* Ring1-mediated ubiquitination of H2A restrains poised RNA  
919 polymerase II at bivalent genes in mouse ES cells. *Nature cell biology* **9**, 1428-  
920 1435 (2007).  
921
- 922 17. Liu R, Li X, Chen W, Du J. Structure and mechanism of plant histone mark  
923 readers. *Science China Life sciences* **61**, 170-177 (2018).  
924
- 925 18. Yang N, Xu RM. Structure and function of the BAH domain in chromatin  
926 biology. *Critical reviews in biochemistry and molecular biology* **48**, 211-221  
927 (2013).  
928
- 929 19. Li Y, Li H. Many keys to push: diversifying the 'readership' of plant  
930 homeodomain fingers. *Acta biochimica et biophysica Sinica* **44**, 28-39 (2012).  
931
- 932 20. Du J, *et al.* Dual binding of chromomethylase domains to H3K9me2-containing  
933 nucleosomes directs DNA methylation in plants. *Cell* **151**, 167-180 (2012).  
934
- 935 21. Kuo AJ, *et al.* The BAH domain of ORC1 links H4K20me2 to DNA replication  
936 licensing and Meier-Gorlin syndrome. *Nature* **484**, 115-119 (2012).  
937
- 938 22. Li S, *et al.* Structural Basis for the Unique Multivalent Readout of Unmodified  
939 H3 Tail by Arabidopsis ORC1b BAH-PHD Cassette. *Structure* **24**, 486-494  
940 (2016).  
941
- 942 23. Armache KJ, Garlick JD, Canzio D, Narlikar GJ, Kingston RE. Structural basis  
943 of silencing: Sir3 BAH domain in complex with a nucleosome at 3.0 Å  
944 resolution. *Science* **334**, 977-982 (2011).  
945
- 946 24. Yang D, *et al.* Nalpha-acetylated Sir3 stabilizes the conformation of a  
947 nucleosome-binding loop in the BAH domain. *Nat Struct Mol Biol* **20**, 1116-  
948 1118 (2013).  
949
- 950 25. Arnaudo N, Fernandez IS, McLaughlin SH, Peak-Chew SY, Rhodes D, Martino  
951 F. The N-terminal acetylation of Sir3 stabilizes its binding to the nucleosome  
952 core particle. *Nat Struct Mol Biol* **20**, 1119-1121 (2013).  
953
- 954 26. Wang F, *et al.* Heterochromatin protein Sir3 induces contacts between the  
955 amino terminus of histone H4 and nucleosomal DNA. *Proc Natl Acad Sci U S*



- 956 *A* **110**, 8495-8500 (2013).  
957
- 958 27. Yang Z, *et al.* EBS is a bivalent histone reader that regulates floral phase  
959 transition in Arabidopsis. *Nature genetics* **50**, 1247-1253 (2018).  
960
- 961 28. Qian S, *et al.* Dual recognition of H3K4me3 and H3K27me3 by a plant histone  
962 reader SHL. *Nature communications* **9**, 2425 (2018).  
963
- 964 29. Li Z, Fu X, Wang Y, Liu R, He Y. Polycomb-mediated gene silencing by the  
965 BAH-EMF1 complex in plants. *Nature genetics* **50**, 1254-1261 (2018).  
966
- 967 30. Zhao D, *et al.* The BAH domain of BAHD1 is a histone H3K27me3 reader.  
968 *Protein Cell* **7**, 222-226 (2016).  
969
- 970 31. Luo X, He Y. Experiencing winter for spring flowering - a molecular epigenetic  
971 perspective on vernalization. *Journal of integrative plant biology*, (2019).  
972
- 973 32. Noh B, *et al.* Divergent roles of a pair of homologous jumonji/zinc-finger-class  
974 transcription factor proteins in the regulation of Arabidopsis flowering time. *The*  
975 *Plant cell* **16**, 2601-2613 (2004).  
976
- 977 33. Goodrich J, Puangsomlee P, Martin M, Long D, Meyerowitz EM, Coupland G.  
978 A Polycomb-group gene regulates homeotic gene expression in Arabidopsis.  
979 *Nature* **386**, 44-51 (1997).  
980
- 981 34. Yan W, *et al.* Dynamic and spatial restriction of Polycomb activity by plant  
982 histone demethylases. *Nature plants* **4**, 681-689 (2018).  
983
- 984 35. Zheng S, *et al.* The Arabidopsis H3K27me3 demethylase JUMONJI 13 is a  
985 temperature and photoperiod dependent flowering repressor. *Nature*  
986 *communications* **10**, 1303 (2019).  
987
- 988 36. Yang H, Howard M, Dean C. Physical coupling of activation and derepression  
989 activities to maintain an active transcriptional state at FLC. *Proceedings of the*  
990 *National Academy of Sciences of the United States of America* **113**, 9369-9374  
991 (2016).  
992
- 993 37. Gaudin V, *et al.* Mutations in LIKE HETEROCHROMATIN PROTEIN 1 affect  
994 flowering time and plant architecture in Arabidopsis. *Development* **128**, 4847-  
995 4858 (2001).  
996

- 997 38. Gomez-Mena C, Pineiro M, Franco-Zorrilla JM, Salinas J, Coupland G,  
998 Martinez-Zapater JM. early bolting in short days: an Arabidopsis mutation that  
999 causes early flowering and partially suppresses the floral phenotype of leafy.  
1000 *The Plant cell* **13**, 1011-1024 (2001).  
1001
- 1002 39. Sung S, *et al.* Epigenetic maintenance of the vernalized state in Arabidopsis  
1003 thaliana requires LIKE HETEROCHROMATIN PROTEIN 1. *Nature genetics*  
1004 **38**, 706-710 (2006).  
1005
- 1006 40. Mylne JS, *et al.* LHP1, the Arabidopsis homologue of HETEROCHROMATIN  
1007 PROTEIN1, is required for epigenetic silencing of FLC. *Proceedings of the*  
1008 *National Academy of Sciences of the United States of America* **103**, 5012-5017  
1009 (2006).  
1010
- 1011 41. Duan CG, *et al.* A protein complex regulates RNA processing of intronic  
1012 heterochromatin-containing genes in Arabidopsis. *Proceedings of the National*  
1013 *Academy of Sciences of the United States of America* **114**, E7377-E7384 (2017).  
1014
- 1015 42. Wang X, *et al.* RNA-binding protein regulates plant DNA methylation by  
1016 controlling mRNA processing at the intronic heterochromatin-containing gene  
1017 IBM1. *Proceedings of the National Academy of Sciences of the United States of*  
1018 *America* **110**, 15467-15472 (2013).  
1019
- 1020 43. Michaels SD, Amasino RM. FLOWERING LOCUS C encodes a novel MADS  
1021 domain protein that acts as a repressor of flowering. *The Plant cell* **11**, 949-956  
1022 (1999).  
1023
- 1024 44. Sheldon CC, *et al.* The FLF MADS box gene: a repressor of flowering in  
1025 Arabidopsis regulated by vernalization and methylation. *The Plant cell* **11**, 445-  
1026 458 (1999).  
1027
- 1028 45. Searle I, *et al.* The transcription factor FLC confers a flowering response to  
1029 vernalization by repressing meristem competence and systemic signaling in  
1030 Arabidopsis. *Genes & development* **20**, 898-912 (2006).  
1031
- 1032 46. Suarez-Lopez P, Wheatley K, Robson F, Onouchi H, Valverde F, Coupland G.  
1033 CONSTANS mediates between the circadian clock and the control of flowering  
1034 in Arabidopsis. *Nature* **410**, 1116-1120 (2001).  
1035
- 1036 47. Imaizumi T, Kay SA. Photoperiodic control of flowering: not only by  
1037 coincidence. *Trends in plant science* **11**, 550-558 (2006).  
1038

- 1039 48. Turck F, Fornara F, Coupland G. Regulation and identity of florigen:  
1040 FLOWERING LOCUS T moves center stage. *Annual review of plant biology*  
1041 **59**, 573-594 (2008).  
1042
- 1043 49. Dennis ES, Peacock WJ. Epigenetic regulation of flowering. *Current opinion in*  
1044 *plant biology* **10**, 520-527 (2007).  
1045
- 1046 50. Duan CG, Zhu JK, Cao X. Retrospective and perspective of plant epigenetics  
1047 in China. *Journal of genetics and genomics = Yi chuan xue bao* **45**, 621-638  
1048 (2018).  
1049
- 1050 51. Patel DJ. A Structural Perspective on Readout of Epigenetic Histone and DNA  
1051 Methylation Marks. *Cold Spring Harb Perspect Biol* **8**, a018754 (2016).  
1052
- 1053 52. Bergamin E, *et al.* Molecular basis for the methylation specificity of ATXR5 for  
1054 histone H3. *Nucleic acids research* **45**, 6375-6387 (2017).  
1055
- 1056 53. Kim GT, Tsukaya H, Uchimiya H. The CURLY LEAF gene controls both  
1057 division and elongation of cells during the expansion of the leaf blade in  
1058 *Arabidopsis thaliana*. *Planta* **206**, 175-183 (1998).  
1059
- 1060 54. Lindroth AM, *et al.* Dual histone H3 methylation marks at lysines 9 and 27  
1061 required for interaction with CHROMOMETHYLASE3. *The EMBO journal*  
1062 **23**, 4286-4296 (2004).  
1063
- 1064 55. Takagi J, *et al.* MAIGO5 functions in protein export from Golgi-associated  
1065 endoplasmic reticulum exit sites in *Arabidopsis*. *The Plant cell* **25**, 4658-4675  
1066 (2013).  
1067
- 1068 56. Pastor-Cantizano N, Bernat-Silvestre C, Marcote MJ, Aniento F. Loss of  
1069 *Arabidopsis* p24 function affects ERD2 trafficking and Golgi structure, and  
1070 activates the unfolded protein response. *Journal of cell science* **131**, (2018).  
1071
- 1072 57. Gimeno-Ferrer F, *et al.* alpha2-COP is involved in early secretory traffic in  
1073 *Arabidopsis* and is required for plant growth. *Journal of experimental botany*  
1074 **68**, 391-401 (2017).  
1075
- 1076 58. Brosseau C, Moffett P. Functional and Genetic Analysis Identify a Role for  
1077 *Arabidopsis* ARGONAUTE5 in Antiviral RNA Silencing. *The Plant cell* **27**,  
1078 1742-1754 (2015).  
1079

- 1080 59. Garcia-Ruiz H, *et al.* Roles and programming of Arabidopsis ARGONAUTE  
1081 proteins during Turnip mosaic virus infection. *PLoS pathogens* **11**, e1004755  
1082 (2015).  
1083
- 1084 60. Minoia S, *et al.* Specific argonautes selectively bind small RNAs derived from  
1085 potato spindle tuber viroid and attenuate viroid accumulation in vivo. *Journal*  
1086 *of virology* **88**, 11933-11945 (2014).  
1087
- 1088 61. Tucker MR, Okada T, Hu Y, Scholefield A, Taylor JM, Koltunow AM. Somatic  
1089 small RNA pathways promote the mitotic events of megagametogenesis during  
1090 female reproductive development in Arabidopsis. *Development* **139**, 1399-1404  
1091 (2012).  
1092
- 1093 62. Borges F, Pereira PA, Slotkin RK, Martienssen RA, Becker JD. MicroRNA  
1094 activity in the Arabidopsis male germline. *Journal of experimental botany* **62**,  
1095 1611-1620 (2011).  
1096
- 1097 63. Luo C, Sidote DJ, Zhang Y, Kerstetter RA, Michael TP, Lam E. Integrative  
1098 analysis of chromatin states in Arabidopsis identified potential regulatory  
1099 mechanisms for natural antisense transcript production. *The Plant journal : for*  
1100 *cell and molecular biology* **73**, 77-90 (2013).  
1101
- 1102 64. Harlen KM, Churchman LS. The code and beyond: transcription regulation by  
1103 the RNA polymerase II carboxy-terminal domain. *Nature reviews Molecular*  
1104 *cell biology* **18**, 263-273 (2017).  
1105
- 1106 65. Hajheidari M, Koncz C, Eick D. Emerging roles for RNA polymerase II CTD  
1107 in Arabidopsis. *Trends in plant science* **18**, 633-643 (2013).  
1108
- 1109 66. Koiwa H, *et al.* Arabidopsis C-terminal domain phosphatase-like 1 and 2 are  
1110 essential Ser-5-specific C-terminal domain phosphatases. *Proceedings of the*  
1111 *National Academy of Sciences of the United States of America* **101**, 14539-  
1112 14544 (2004).  
1113
- 1114 67. Zhu J, Liu M, Liu X, Dong Z. RNA polymerase II activity revealed by GRO-  
1115 seq and pNET-seq in Arabidopsis. *Nature plants* **4**, 1112-1123 (2018).  
1116
- 1117 68. Du J, Patel DJ. Structural biology-based insights into combinatorial readout and  
1118 crosstalk among epigenetic marks. *Biochim Biophys Acta* **1839**, 719-727  
1119 (2014).  
1120

- 1121 69. Ding Y, Avramova Z, Fromm M. Two distinct roles of ARABIDOPSIS  
1122 HOMOLOG OF TRITHORAX1 (ATX1) at promoters and within transcribed  
1123 regions of ATX1-regulated genes. *The Plant cell* **23**, 350-363 (2011).  
1124
- 1125 70. Kooistra SM, Helin K. Molecular mechanisms and potential functions of  
1126 histone demethylases. *Nature reviews Molecular cell biology* **13**, 297-311  
1127 (2012).  
1128
- 1129 71. Srivastava R, Ahn SH. Modifications of RNA polymerase II CTD: Connections  
1130 to the histone code and cellular function. *Biotechnology advances* **33**, 856-872  
1131 (2015).  
1132
- 1133 72. Estaras C, Fueyo R, Akizu N, Beltran S, Martinez-Balbas MA. RNA  
1134 polymerase II progression through H3K27me3-enriched gene bodies requires  
1135 JMJD3 histone demethylase. *Molecular biology of the cell* **24**, 351-360 (2013).  
1136
- 1137 73. Chen S, *et al.* The histone H3 Lys 27 demethylase JMJD3 regulates gene  
1138 expression by impacting transcriptional elongation. *Genes & development* **26**,  
1139 1364-1375 (2012).  
1140
- 1141 74. Ivaldi MS, Karam CS, Corces VG. Phosphorylation of histone H3 at Ser10  
1142 facilitates RNA polymerase II release from promoter-proximal pausing in  
1143 *Drosophila*. *Genes & development* **21**, 2818-2831 (2007).  
1144
- 1145 75. Rossetto D, Avvakumov N, Cote J. Histone phosphorylation: a chromatin  
1146 modification involved in diverse nuclear events. *Epigenetics* **7**, 1098-1108  
1147 (2012).  
1148
- 1149 76. Duan CG, *et al.* A pair of transposon-derived proteins function in a histone  
1150 acetyltransferase complex for active DNA demethylation. *Cell research* **27**,  
1151 226-240 (2017).  
1152
- 1153 77. Saleh A, Alvarez-Venegas R, Avramova Z. An efficient chromatin  
1154 immunoprecipitation (ChIP) protocol for studying histone modifications in  
1155 Arabidopsis plants. *Nature protocols* **3**, 1018-1025 (2008).  
1156
- 1157 78. Langmead B, Salzberg SL. Fast gapped-read alignment with Bowtie 2. *Nature*  
1158 *methods* **9**, 357-359 (2012).  
1159
- 1160 79. Ramirez F, *et al.* deepTools2: a next generation web server for deep-sequencing  
1161 data analysis. *Nucleic acids research* **44**, W160-165 (2016).

1162

1163 80. Otwinowski Z, Minor W. Processing of X-ray diffraction data collected in  
1164 oscillation mode. *Methods in enzymology* **276**, 307-326 (1997).

1165

1166 81. Adams PD, *et al.* PHENIX: a comprehensive Python-based system for  
1167 macromolecular structure solution. *Acta crystallographica Section D,*  
1168 *Biological crystallography* **66**, 213-221 (2010).

1169

1170 82. Emsley P, Lohkamp B, Scott WG, Cowtan K. Features and development of  
1171 Coot. *Acta crystallographica Section D, Biological crystallography* **66**, 486-  
1172 501 (2010).

1173

1174 83. Roberts TC, Hart JR, Kaikkonen MU, Weinberg MS, Vogt PK, Morris KV.  
1175 Quantification of nascent transcription by bromouridine immunocapture  
1176 nuclear run-on RT-qPCR. *Nature protocols* **10**, 1198-1211 (2015).

1177

1178 84. Tariq M, Saze H, Probst AV, Lichota J, Habu Y, Paszkowski J. Erasure of CpG  
1179 methylation in Arabidopsis alters patterns of histone H3 methylation in  
1180 heterochromatin. *Proceedings of the National Academy of Sciences of the*  
1181 *United States of America* **100**, 8823-8827 (2003).

1182

1183

1184

1185

1186

1187

1188

1189

1190

1191

1192

1193

1194

1195

1196

1197

1198

1199



1200 **SUPPORTING INFORMATION**

1201

1202 Supplementary Fig. 1 PAIPP2 is the closest paralog of AIPP2 in *Arabidopsis*.

1203 Supplementary Fig. 2 Protein interactions revealed by split luciferase assay

1204 Supplementary Fig. 3 Domain requirements for the interactions between BAH-PHD-  
1205 CPL2 complex proteins

1206 Supplementary Fig. 4 Domain requirement for protein interactions

1207 Supplementary Fig. 5 Expression analysis of the *GUS* reporters from BAH-PHD-CPL2  
1208 complex genes in seedlings and inflorescence tissues

1209 Supplementary Fig. 6 CRISPR/Cas9-mediated mutagenesis of *PAIPP2*

1210 Supplementary Fig. 7 Structural analysis of the AIPP3 BAH-H3K27me3 complex

1211 Supplementary Fig. 8 Structural analysis of the AIPP2 PHD-H3 modeled complex

1212 Supplementary Fig. 9 FDR analysis of commonly up-regulated genes in the mutants of  
1213 the BAH-PHD-CPL2 complex

1214 Supplementary Fig. 10 The effects of BPC dysfunctions on the deposition of different  
1215 histone marks

1216 Supplementary Fig. 11 The 170A and Y149A/W170A/Y172A mutations of AIPP3 did  
1217 not affect its interaction with AIPP2 and PAIPP2

1218 Supplementary Fig. 12 Relative occupancy of unphosphorylated and Ser2P-Pol II at  
1219 selected target genes

1220 Supplementary Fig. 13 A structure-based sequence alignment of potential H3K27me3  
1221 reading BAH domains from different species

1222

1223 Supplementary Table 1. IP-MS analysis

1224 Supplementary Table 2. Data collection and refinement statistics

1225 Supplementary Table 3. Commonly up-regulated genes in BPC complex mutants

1226 Supplementary Table 4. Primers used in this study
