# Supplementary material for: Coupling of H3K27me3 recognition with transcriptional repression through the BAH-PHD-CPL2 complex in Arabidopsis
Source: bioRxiv or medRxiv preprint supplement (doi:10.1101/2020.10.15.341198), 2020-10-15
Supplement: Supplementary file [file media-1.pdf]

1 Supplementary Figures

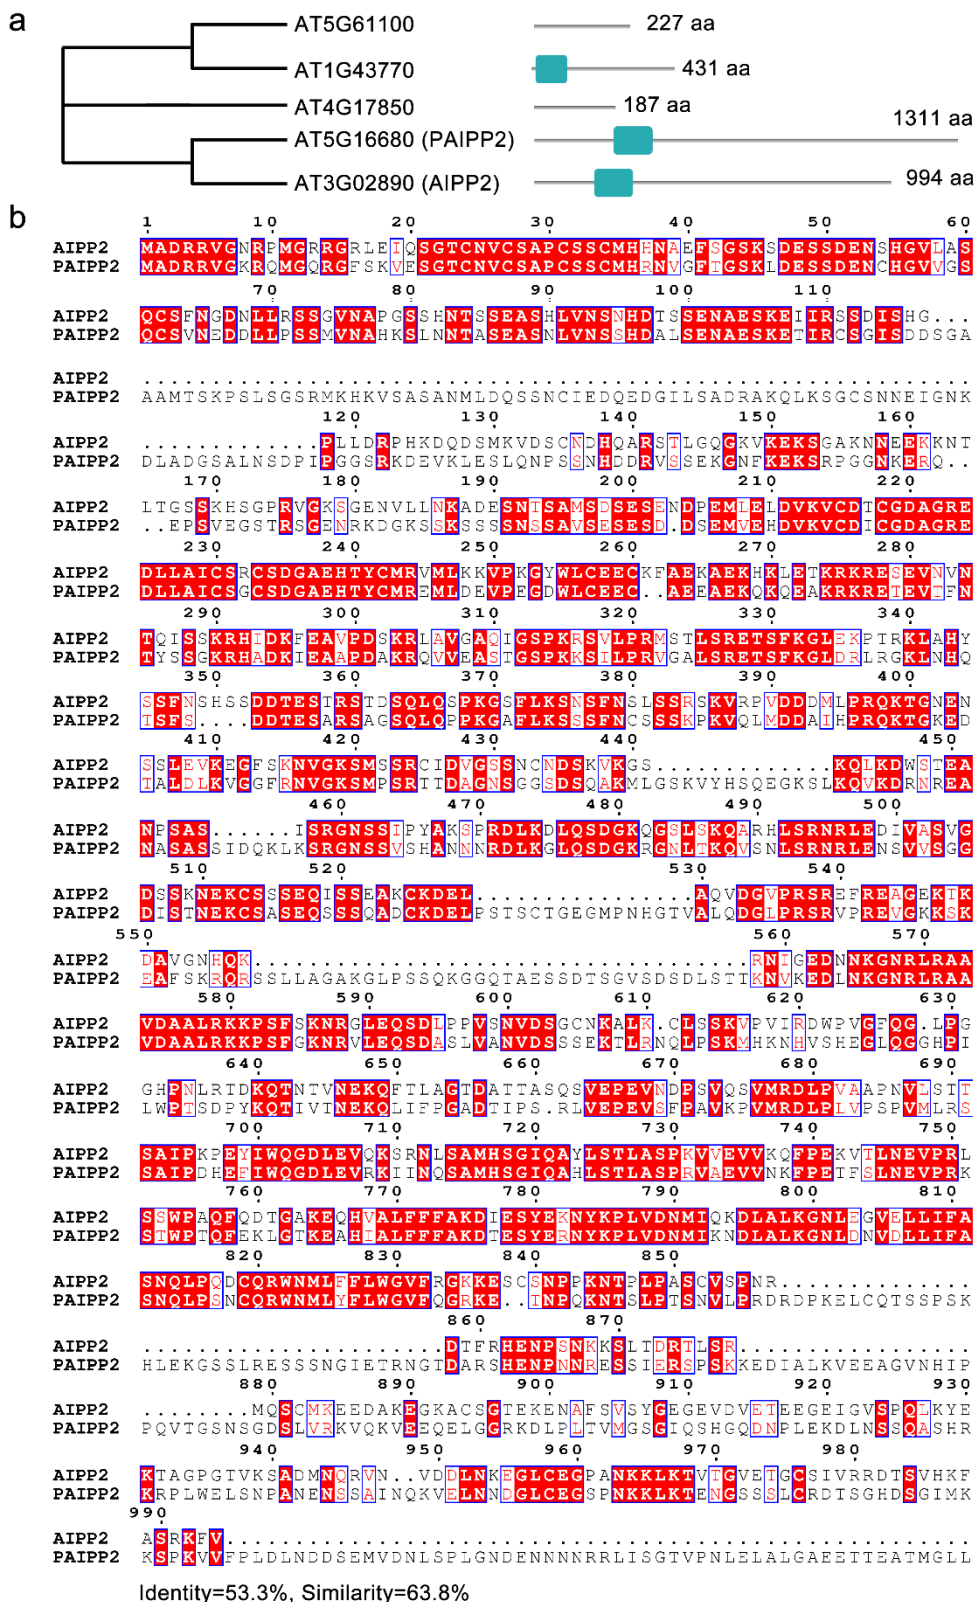

2

3 **Supplementary Fig. 1 PAIPP2 is the closest paralog of AIPP2 in *Arabidopsis*.**

4 **a**, The phylogenetic tree between AIPP2 and its paralog proteins in *Arabidopsis* (left  
 5 panel) and their domain structures. Green boxes indicate PHD domains. **b**, The  
 6 sequence alignment between AIPP2 and PAIPP2 showing the high similarity.

7

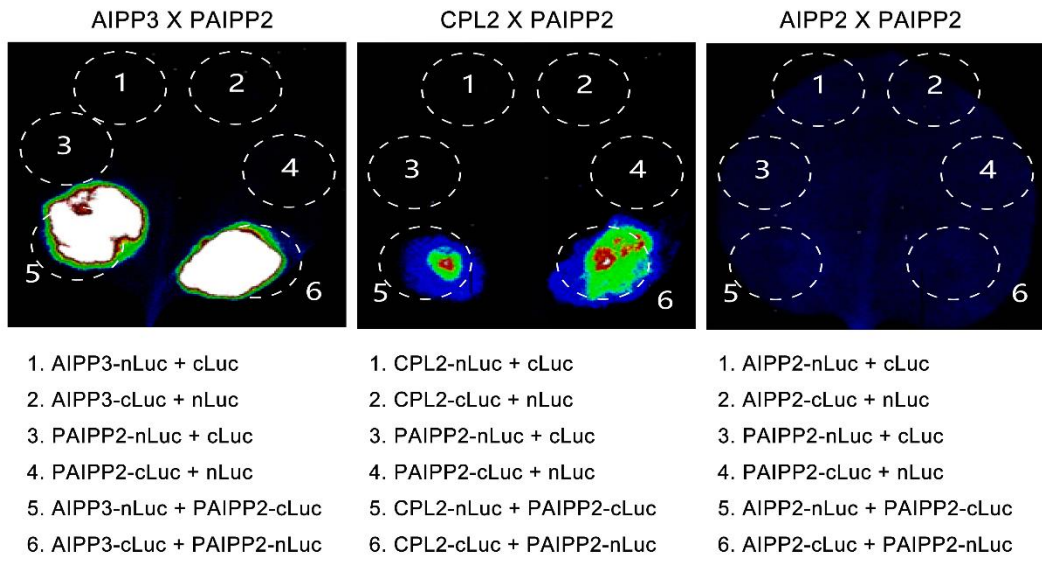

8

9 **Supplementary Fig. 2 Protein interactions revealed by split luciferase assay**

10

11

12

13

14

15

16

17

18

19

20

21

22

23

24

25

26

27

28

29

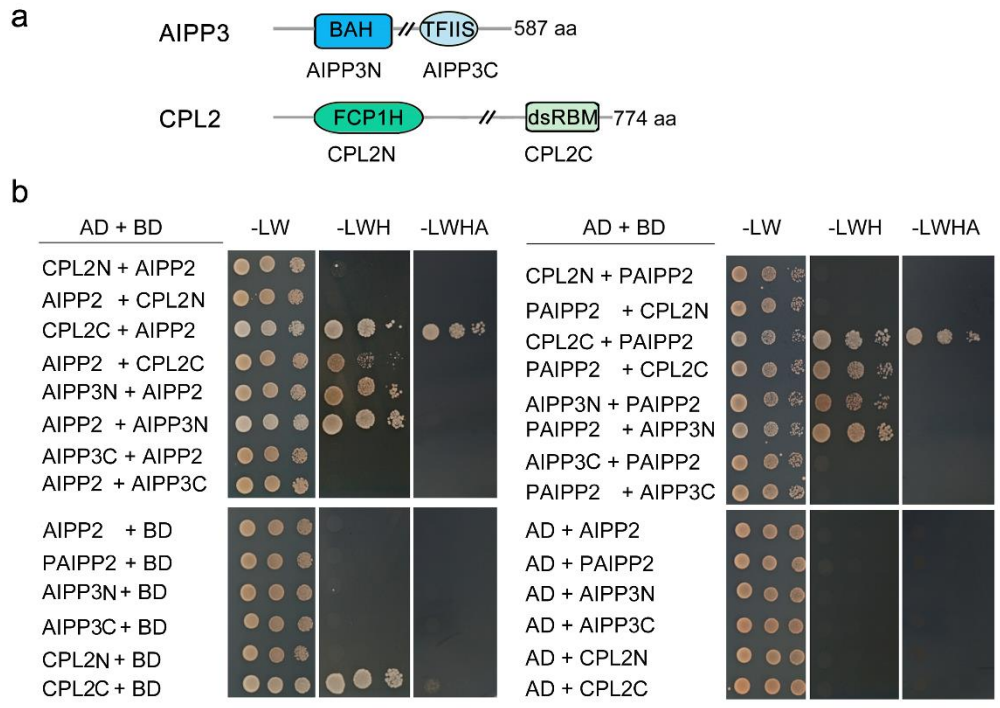

30

31 **Supplementary Fig. 3 Domain requirements for the interactions between BAH-**  
 32 **PHD-CPL2 complex proteins. a**, The diagram showing the domains and truncated  
 33 forms of different proteins. **b**, Y2H assays showing the interactions between the  
 34 truncated forms of proteins. N and C represent the N terminus and C terminus of the  
 35 proteins, respectively.

36

37

38

39

40

41

42

43

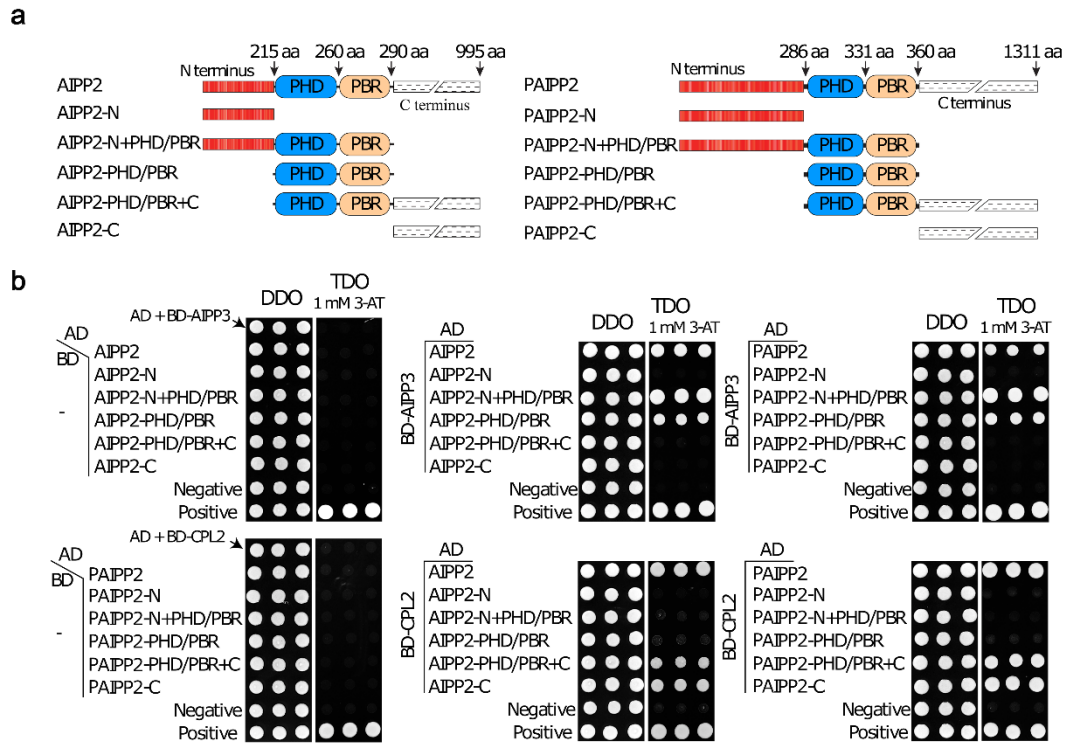

44

45 **Supplementary Fig. 4 Domain requirement for protein interactions.** a, Diagrams  
 46 showing the split domain structure for protein interactions in b and c. b, Yeast two-  
 47 hybrid results showing the protein interactions of different combinations.

48

49

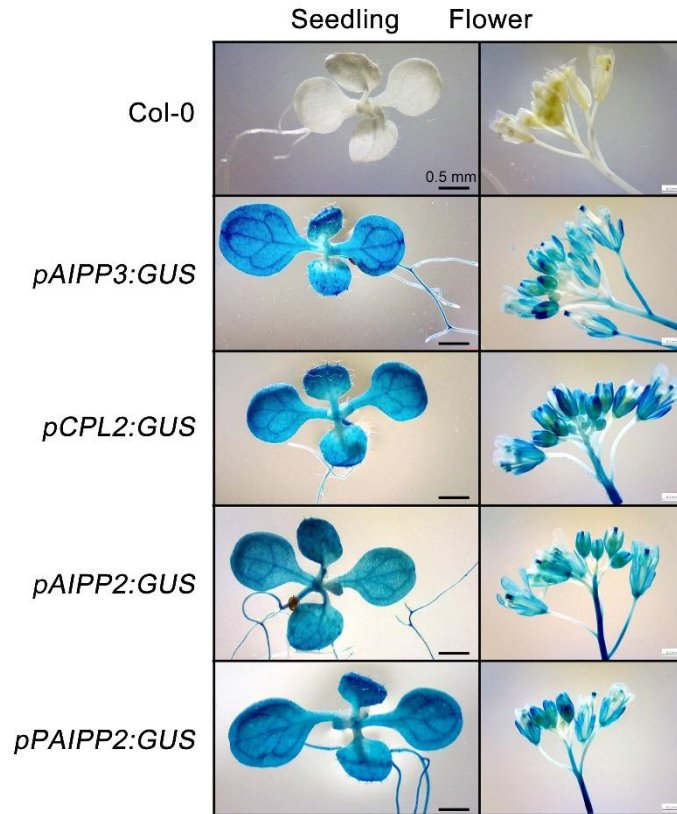

50

51 **Supplementary Fig. 5 Expression analysis of the *GUS* reporters from BAH-PHD-**  
 52 **CPL2 complex genes in seedlings and inflorescence tissues.** *GUS* reporter genes  
 53 were expressed in transgenic *Arabidopsis* under the direction of native *AIPP3*, *AIPP2*,  
 54 *PAIPP2* and *CPL2* promoters. The seedlings and inflorescence tissues were stained to  
 55 detect the *GUS* activity.

56

57

58

59

60

61

62

63

64

65

66

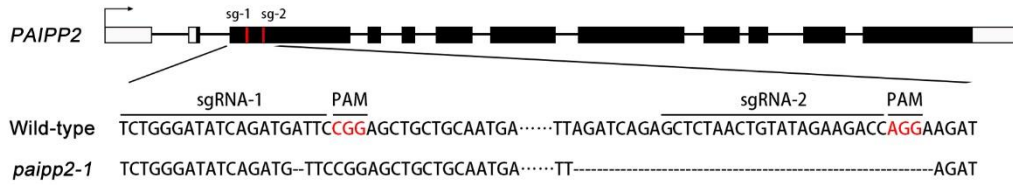

67

68 **Supplementary Fig. 6 CRISPR/Cas9-mediated mutagenesis of PAIPP2.** The  
 69 *paipp2-1* was generated by CRISPR/Cas9-mediated mutagenesis. Two sgRNAs were  
 70 designed to target the N-terminal exon of *PAIPP2*. The *paipp2-1* mutation contains one  
 71 nucleotide deletion and 33 bp deletion.

72

73

74

75

76

77

78

79

80

81

82

83

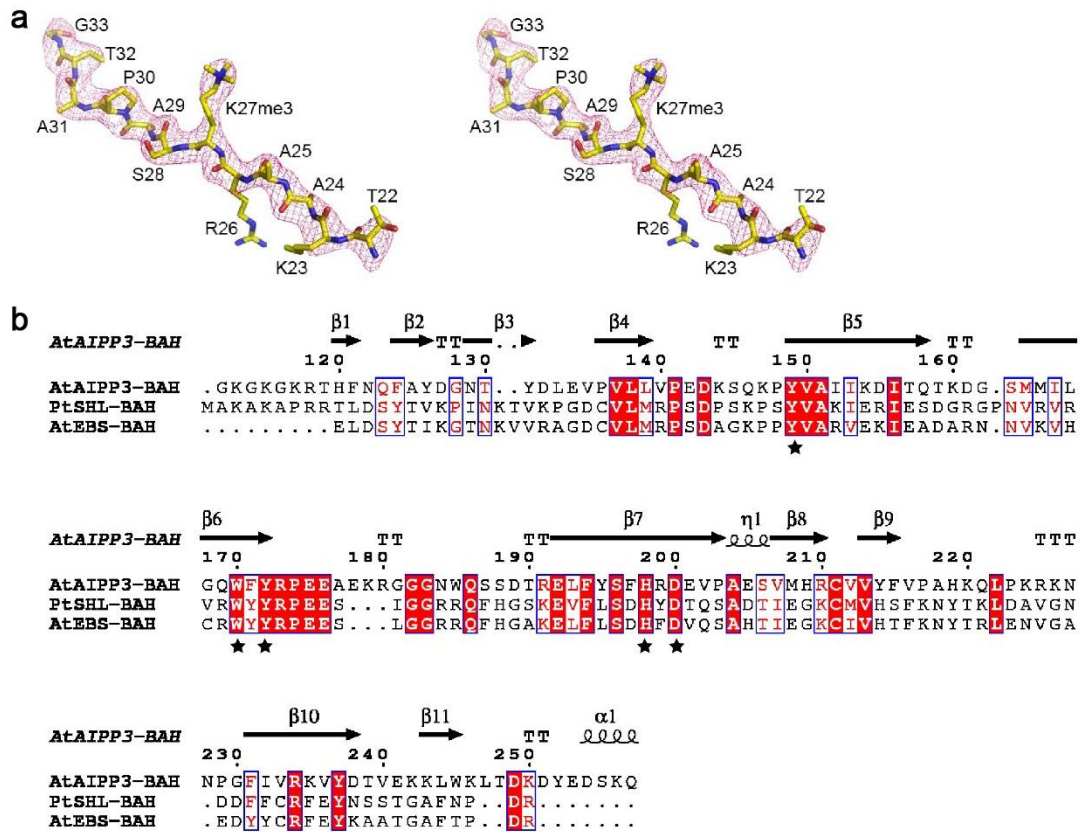

84

85 **Supplementary Fig. 7 Structural analysis of the AIPP3 BAH-H3K27me3 complex.**

86 **a**, A stereo view of the SIGMAA-weighted 2Fo-Fc electron density map of the

87 H3K27me3 peptide. **b**, Structure-based sequence alignment of the BAH domains from

88 *Arabidopsis* AIPP3 (*AtAIPP3*), *Populus trichocarpa* SHL (*PtSHL*), and *Arabidopsis*

89 EBS (*AtEBS*) with the secondary structures of *AtAIPP3* BAH showing on the top of

90 the alignment. The conserved H3K27me3 peptide-interacting residues are highlighted

91 by stars on the bottom.

92

93

94

95

96





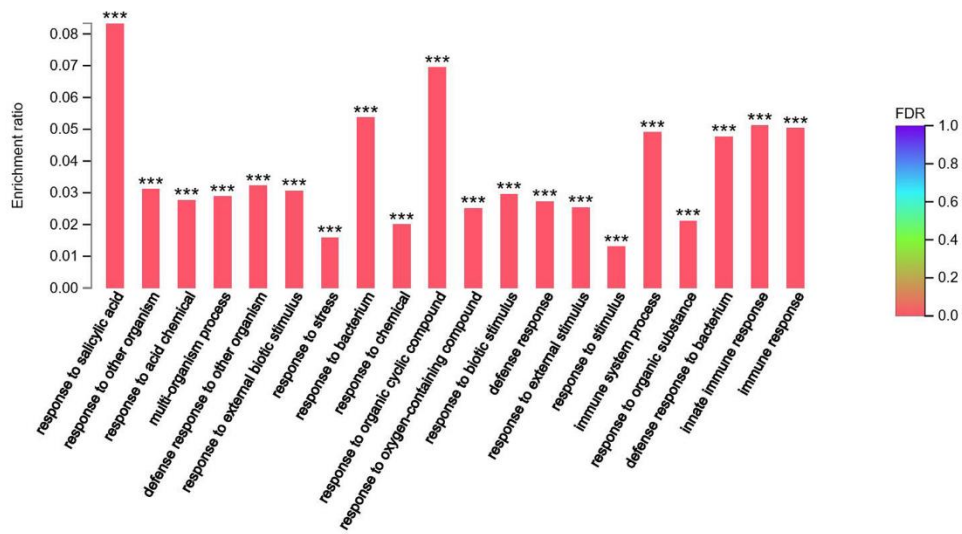

116

117 **Supplementary Fig. 9 FDR analysis of commonly up-regulated genes in the**  
 118 **mutants of the BAH-PHD-CPL2 complex.** Commonly up-regulated genes were  
 119 assigned into different GO terms (x-axis). The y-axis indicates the ratio of the up-  
 120 regulated gene number and the number of genes annotated in this pathway. The color  
 121 indicates significance of enrichment. \*\*\*, p value < 0.001

122

123

124

125

126

127

128

129

130

131

132

133

134

135

136

137

138

139

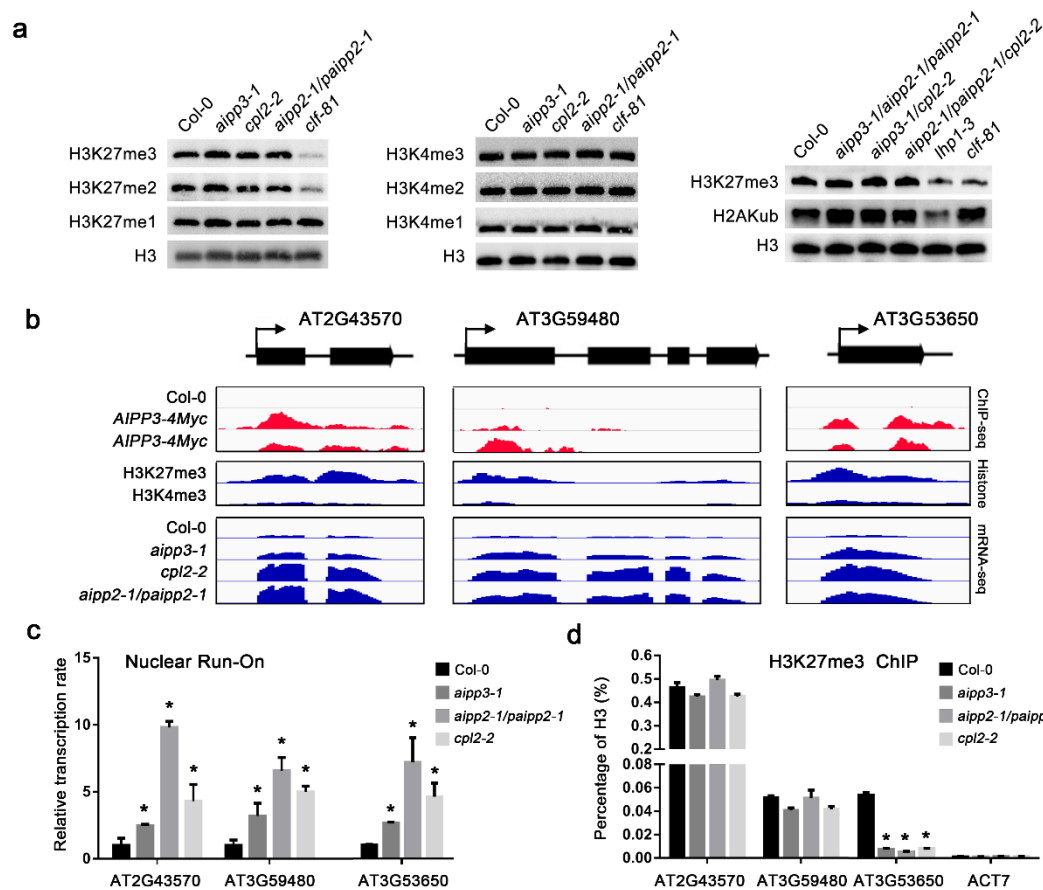

140

141 **Supplementary Fig. 10 The effects of BPC dysfunctions on the deposition of**  
 142 **different histone marks. a** The immunoblotting results showing the accumulation of  
 143 the H3K27me1/2/3, H3K4me1/2/3 and H2Kub marks in the selected mutants. The H3  
 144 levels were determined to use as the loading controls. **b** Snapshots of IGV of AIPP3  
 145 ChIP-seq (upper panel), histone ChIP (middle panel) and mRNA-seq (lower panel)  
 146 showing the distribution patterns of AIPP3, H3K27me3 and H3K4me3 at selected  
 147 target genes, and the relative expression of these genes in different genotypes. **c** Nuclear  
 148 Run-On showing the relative Pol II transcription rate at the selected target genes in Col-  
 149 0 and *bpc* mutants. The relative transcription rate was normalized to *ACT2*. The Data  
 150 are the means  $\pm$ S.D. of three biological repeats. \*, p-value<0.01. **d** ChIP-qPCR results  
 151 showing the relative occupancy of H3K27me3 at selected target genes in Col-0 and *bpc*  
 152 mutants. The occupancy was first normalized to histone H3. The Data are the means  
 153  $\pm$ S.D. of three biological repeats. \*, p-value<0.01.

154

155

156

157

158

159

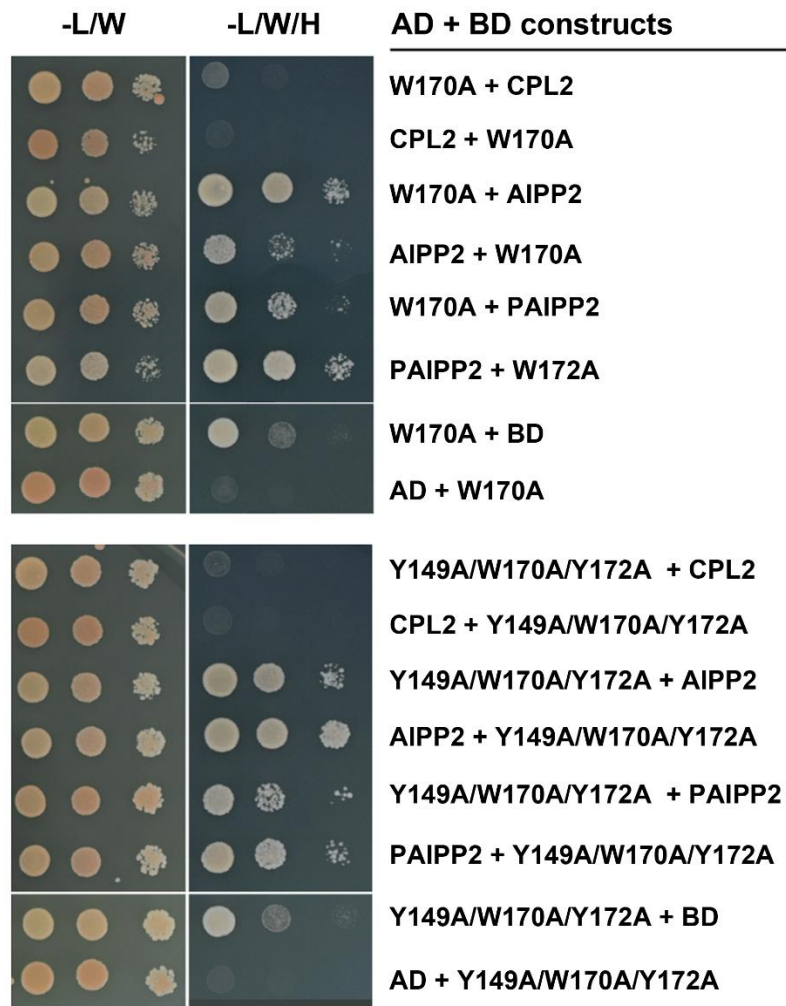

161

162 **Supplementary Fig. 11 The 170A and Y149A/W170A/Y172A mutations of AIPP3**  
 163 **did not affect its interaction with AIPP2 and PAIPP2.** Y2H results showing the  
 164 reciprocal interactions within the tested proteins. Yeast cultures with different protein  
 165 combinations on SD-LW and SD-LWH are shown.

166

167

168

169

170

171

172

173

174

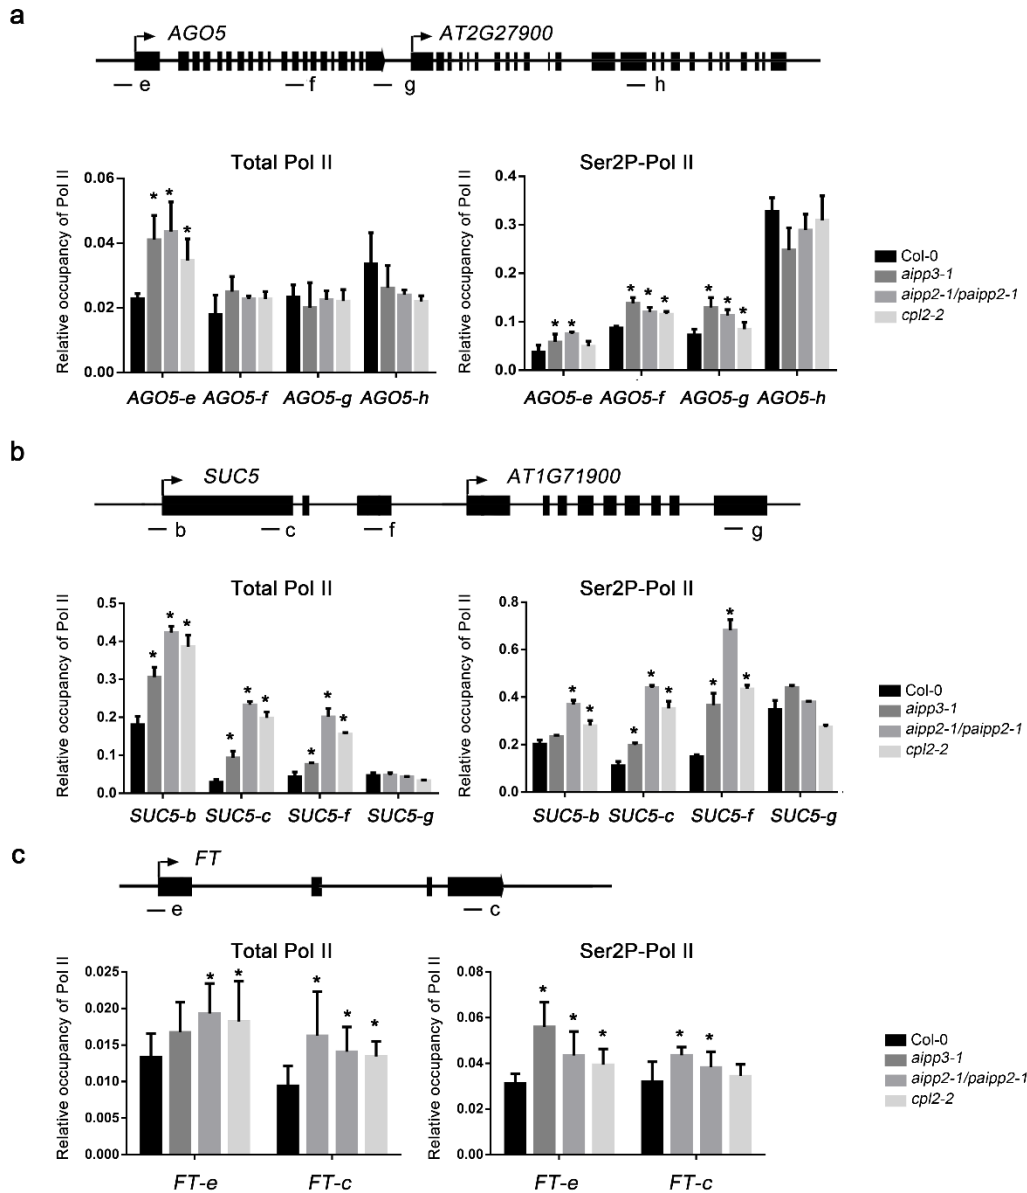

175

176 **Supplementary Fig. 12 Relative occupancy of unphosphorylated and Ser2P-Pol II**  
 177 **at selected target genes.** ChIP-qPCR showing the relative occupancy of  
 178 unphosphorylated (total) and Ser2P-Pol II at *AGO5* (a), *SUC5* (b) and *FT* (c) loci. The  
 179 occupancy was normalized to *ACT7*. The lowercase letters represent positions of ChIP-  
 180 qPCR primers. The Data are the means  $\pm$ S.D. of three biological repeats. Significance  
 181 analysis (t-test) was performed and \* represent p-value <0.01.

182

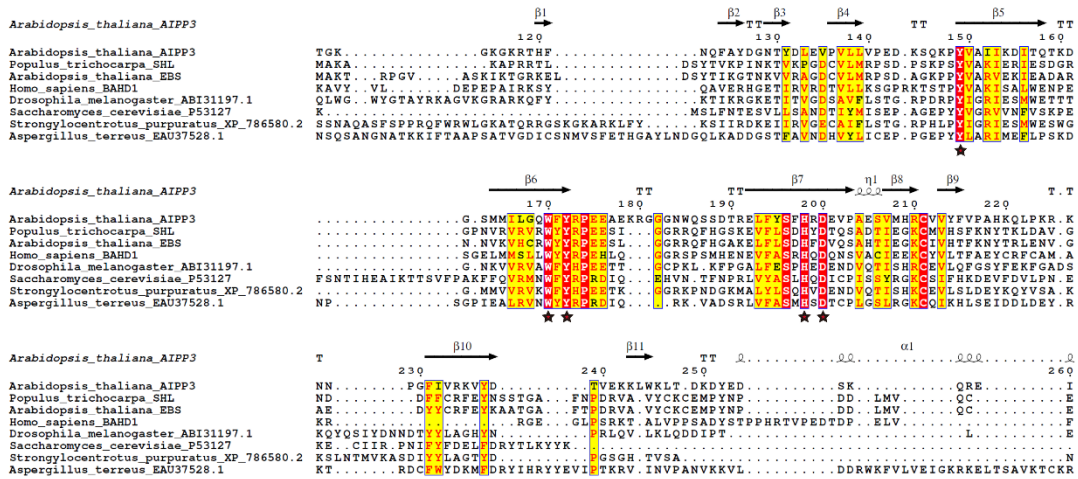

183

184 **Supplementary Fig. 13 A structure-based sequence alignment of potential**  
 185 **H3K27me3 reading BAH domains from different species. The secondary structure**  
 186 **of Arabidopsis AIPP3 BAH domain is on the top of the alignment. The conserved**  
 187 **aromatic cage residues for methyl-lysine binding and histidine and aspartic acid**  
 188 **residues for H3P30 binding are marked with stars.**

189

190

191

192

193

194

195

196

197

198

199

200

201

202

203

204

205

206

207

208 **Supplementary Table 1**  
209 **IP-MS analysis (Supplementary Data 1)**

210

211 **Supplementary Table 2**

212 **Data collection and refinement statistics**

213

---

AIPP3-BAH-H3K27me3

---

| <b>Data collection</b> |                                   |
|------------------------|-----------------------------------|
| Beamline               | SSRF-BL19U1                       |
| Space group            | $P3_121$                          |
| Wavelength (Å)         | 0.9789                            |
| Cell dimensions        |                                   |
| $a=b, c$ (Å)           | 78.6, 72.7                        |
| Resolution (Å)         | 50.0-2.4 (2.44-2.40) <sup>a</sup> |
| $R_{\text{merge}}$     | 0.082 (1.121)                     |
| $I/\sigma I$           | 57.4 (2.8)                        |
| Completeness (%)       | 100.0 (100.0)                     |
| Redundancy             | 19.1 (18.7)                       |

---

| <b>Refinement</b>                   |               |
|-------------------------------------|---------------|
| $R_{\text{work}} / R_{\text{free}}$ | 0.219 / 0.266 |
| No. reflections                     | 10,440        |
| No. atoms                           | 1,408         |
| Protein / Peptide                   | 1,314 / 83    |
| Water / Tris                        | 3 / 8         |
| $B$ -factors (Å <sup>2</sup> )      | 90.7          |
| Protein / Peptide                   | 90.7 / 92.0   |
| Water / Tris                        | 63.3 / 93.6   |
| R.m.s. deviations                   |               |
| Bond lengths (Å)                    | 0.008         |
| Bond angles (°)                     | 0.955         |

---

214 <sup>a</sup> Highest-resolution shell is shown in parentheses.

215

216







**Supplementary Table 4. Primers used in this study**

| <b>Primer</b>    | <b>Sequence (5'-3')</b>        | <b>Purpose</b> |               |
|------------------|--------------------------------|----------------|---------------|
| FLC-qF           | GCAACGGTCTCATCGAGAAAGCT        | RT-qPCR        |               |
| FLC-qR           | GATCATCAGCATGCTGTTTCCCAT       |                |               |
| FT-qF            | GACCTCAGGAACTTCTATACTTTGGTTATG |                |               |
| FT-qR            | CTGTTTGCCTGCCAAGCTG            |                |               |
| SOC1-qF          | GAGAAAGCTCTAGCTGCAGAA          |                |               |
| SOC1-qR          | CTTGGGCTACTCTCTTCATCAC         |                |               |
| AGO5-qF          | GAGTAAGCGAAGGGCAGTTTAG         |                |               |
| AGO5-qR          | CACGAAAGTAACACGAGGAACA         |                |               |
| SUC5-qF          | ATTGGATGGGTCGTGAAGTG           |                |               |
| SUC5-qR          | CCTGAACTCCTTGGTTCGTAAAG        |                |               |
| ACT2-qF          | AGGTCCAGGAATCGTTCACA           | RT /NRO-qPCR   |               |
| ACT2-qR          | GAGTTTGTACACACAAGTGC           |                |               |
| 18SrRNA-NRO-qF   | TCCTAGTAAGCGCGAGTCATCA         | NRO-qPCR       |               |
| 18SrRNA-NRO-qR   | CGAACACTTCACCGGATCAT           |                |               |
| AGO5-NRO-qF      | GAGTAAGCGAAGGGCAGTTTAG         |                |               |
| AGO5-NRO-qR      | CACGAAAGTAACACGAGGAACA         |                |               |
| AT2G27900-NRO-qF | GAGAAGGAGACATGGACGAAAT         |                |               |
| AT2G27900-NRO-qR | GAGTGAGGGAATCTGGAAGAAC         |                |               |
| SUC5-NRO-qF      | ATTGGATGGGTCGTGAAGTG           |                |               |
| SUC5-NRO-qR      | CCTGAACTCCTTGGTTCGTAAAG        |                |               |
| AT1G71900-NRO-qF | GTTGCGGATAAGCAAGCATATAA        |                |               |
| AT1G71900-NRO-qR | GTTATCGCAGTGGACCAGAA           |                |               |
| FT-NRO-qF        | GGCCAAAGAGAGGTGACTAATG         |                |               |
| FT-NRO-qR        | GGTCTTCTCCACCAATCTCAAC         |                |               |
| AT2G43570-F      | GTGTCACCGTTCCTTCTAGTG          |                | NRO/ChIP-qPCR |
| AT2G43570-R      | GTTGCAGCAAATATGGCTACTG         |                |               |
| AT3G53650-F      | AGCATCAATGGCTCCGAAA            |                |               |
| AT3G53650-R      | CTTCTTCTCCGCCTTTGGTAA          |                |               |
| AT3G59480-F      | CTGCATCTAACGGCGAGAAA           |                |               |
| AT3G59480-R      | TTGATGAAGCCAGGAGCATC           |                |               |
| AGO5a-qF         | CCTCCAATCGAATCCACAAGAT         | ChIP-qPCR      |               |
| AGO5a-qR         | GTCCATAACATAACGTGCCAAATAG      |                |               |
| AGO5b-qF         | GAAACGTCGGAAGAGGTGAA           |                |               |
| AGO5b-qR         | AGACGAAGACGCAACAGAAA           |                |               |
| AGO5c-qF         | GAGTAAGCGAAGGGCAGTTTAG         |                |               |
| AGO5c-qR         | CACGAAAGTAACACGAGGAACA         |                |               |
| AGO5d-qF         | GGCACTGGTGTTCATGGATTTA         |                |               |
| AGO5d-qR         | CTCAGGACGATCGGAGATAGAA         |                |               |
| AGO5e-qF         | CCGGGAATGCAAAGAGATGA           |                |               |
| AGO5e-qR         | AAACTGGTACTTGTGTGTATTGTG       |                |               |

|          |                             |
|----------|-----------------------------|
| AGO5f-qF | CCTGCTATTCCGTTTCATCTCTT     |
| AGO5f-qR | GATCCAGTCACATCAGGCAATA      |
| AGO5g-qF | TTGAAGGATCTGGCCAACCTT       |
| AGO5g-qR | TGAGCCAAATCATCGTCCAA        |
| AGO5h-qF | GAGAAGGAGACATGGACGAAAT      |
| AGO5h-qR | GAGTGAGGGAATCTGGAAGAAC      |
| SUC5a-qF | GACCGTCTATTTACCCCTTCTT      |
| SUC5a-qR | GTGTGATCTTCTGGGTCTTTCT      |
| SUC5b-qF | CTCCAATGTCTCATCTCCTACATC    |
| SUC5b-qR | CTCTAACGCCGTAGCATTGT        |
| SUC5c-qF | ATTGGATGGGTCGTGAAGTG        |
| SUC5c-qR | CCTGAACTCCTTGGTCGTAAAG      |
| SUC5d-qF | CCTAGTCTCACAGCAGGAATTA      |
| SUC5d-qR | GACCCAGACGAACCCTAAAT        |
| SUC5e-qF | GGCAACTTTGGCAAGTATGTT       |
| SUC5e-qR | TGTTACGCCAGCCTTGTT          |
| SUC5f-qF | CCAATGGGCCTTTCACTCTT        |
| SUC5f-qR | AGAACTGGCCTCATATTCCTTAATC   |
| SUC5g-qF | GTTGCGGATAAGCAAGCATATAA     |
| SUC5g-qR | GTTATCGCAGTGGACCAGAA        |
| FTa-qF   | GTTCGGACATTGGTAGGTATGG      |
| FTa-qR   | AAGGGATCCTTCAGGTTAGATAGA    |
| FTb-qF   | GGCCAAAGAGAGGTGACTAATG      |
| FTb-qR   | GGTCTTCTCCACCAATCTCAAC      |
| FTc-qF   | GGAATTCATCGTGTCTGTTT        |
| FTc-qR   | GGAAGGCCGAGATTGTAGAT        |
| FTd-qF   | TGGGATAAATACGAGGAACAACT     |
| FTd-qR   | GATCTAACCATAACTTGACAGCATAAC |
| FTe-qF   | TTCACCGACCCGAGTTAATG        |
| FTe-qR   | GGTGGTTTCTCTGTGTTGATTG      |
| ACT7-qF  | CGTTTCGCTTTCCTTAGTGTTAGCT   |
| ACT7-qR  | AGCGAACGGATCTAGAGACTCACCTTG |
| AtSN1-qF | CCAGAAATTCATCTTCTTTGGAAAAG  |
| AtSN1-qR | GCCCAGTGGTAAATCTCTCAGATAGA  |

---

227

228

229
